1 **Glycine acylation and trafficking of a new class of bacterial lipoprotein by a composite secretion**  
2 **system.**

3 Christopher Icke<sup>1</sup>, Freya J. Hodges<sup>1</sup>, Karthik Puella<sup>1</sup>, Samantha A. McKeand<sup>2</sup>, Jack A. Bryant<sup>2</sup>, Adam  
4 F. Cunningham<sup>2,3</sup>, Jeff A. Cole<sup>2</sup>, Ian R. Henderson<sup>1\*</sup>.

5 <sup>1</sup>Institute for Molecular Bioscience, University of Queensland, Brisbane, Australia; <sup>2</sup>Institute of  
6 Microbiology and Infection and <sup>3</sup>Institute of Immunology and Immunotherapy, University of  
7 Birmingham, Birmingham, UK

8 \*For correspondence: Ian Henderson ([i.henderson@uq.edu.au](mailto:i.henderson@uq.edu.au))

9

## 10 **Abstract**

11 Protein acylation is critical for many cellular functions including signal transduction, cell division and  
12 development. In bacteria, such lipoproteins have important roles in virulence and are therefore potential  
13 targets for the development of novel antimicrobials and vaccines. To date, all known bacterial  
14 lipoproteins are secreted from the cytosol via the Sec pathway, acylated on an N-terminal cysteine  
15 residue through the action of Lgt, Lsp and Lnt, and then targeted to the appropriate cellular location. In  
16 the case of Gram-negative bacteria, the lipoprotein trafficking Lol pathway transports the lipoproteins  
17 to the outer membrane where most substrate molecules are retained within the cell. Here we identify a  
18 new secretion pathway that displays the substrate lipoprotein on the cell surface. We demonstrate that  
19 the previously identified *E. coli* Aat secretion system is a composite system that shares similarity with  
20 type I secretion systems and elements of the Lol pathway. Remarkably, during secretion by the Aat  
21 system, the AatD subunit acylates the substrate CexE on a highly conserved N-terminal glycine residue  
22 (rather than the canonical cysteine). Mutations in AatD or CexE that disrupt glycine acylation interfere  
23 with membrane incorporation and trafficking. Our data suggest that CexE is the first member of a new  
24 class of glycine-acylated bacterial lipoprotein, while Aat represents a new secretion system that we  
25 propose be defined as a lipoprotein secretion system (LSS).

## 26 **Introduction**

27 Protein acylation by the covalent attachment of fatty acids occurs for hundreds of proteins in  
28 eukaryotic and prokaryotic organisms. This event confers distinct biochemical properties, enabling  
29 acylation to regulate intracellular trafficking, subcellular localization, protein-protein and protein-lipid  
30 interactions and are of obvious importance to cell biology. As a consequence, lipoproteins are key  
31 components of bacterial pathogens and have been targeted for antibiotic and vaccine development (Dev  
32 et al., 1985). In Gram-negative bacteria, lipoproteins are transported across the inner membrane from  
33 the cytosol to the periplasm by the Sec pathway. However, in Gram-positive cells lipoproteins can also  
34 be secreted by the TAT pathway (Thompson et al., 2010; Widdick et al., 2011). The signal peptide  
35 inserts into the inner membrane and a diacylglycerol is attached by Lgt to the sulphur moiety of the  
36 invariant cysteine at the +1 position of the lipoprotein. The signal sequence is then cleaved by Lsp  
37 exposing the N-terminal amine group of the cysteine for monoacylation by Lnt (Gupta et al., 1993;  
38 Masao Tokunaga et al., 1984). Lnt mediated acylation occurs at the free amine moiety of the N-terminal  
39 cysteine after signal sequence cleavage by Lsp (Signal Peptidase II). The mature triacylated lipoprotein  
40 remains embedded in the inner membrane or is localised to the inner leaflet of the outer membrane by  
41 the essential Lol pathway. LolCE, in combination with the ATPase LolD, extracts the triacylated  
42 lipoprotein from the inner membrane for transport across the periplasm by LolA, where it is then  
43 incorporated into the inner leaflet of the outer membrane by LolB. While the majority remain  
44 periplasmically located, in recent years there have been a number of descriptions of surface localised  
45 outer membrane lipoproteins (Baldi et al., 2012; Cowles et al., 2012; Konovalova et al., 2014).  
46 However, the mechanism of translocation across the outer membrane to the cell surface remains poorly  
47 understood.

48 Previously, we described two outer membrane proteins, CexE and Aap, associated with  
49 enterotoxigenic (ETEC) and enteroaggregative *Escherichia coli* (EAEC), respectively (Crossman et al.,  
50 2010; Sheikh et al., 2002). CexE has been implicated in prolonged bacterial shedding and increased  
51 severity of infection (Rivas et al., 2020) whereas Aap influences biofilm formation and gut colonisation  
52 (Belmont-Monroy et al., 2020; Sheikh et al., 2002). Despite Aap and CexE sharing only 18% amino

53 acid identity, both proteins are secreted by the Aat system (Belmont-Monroy et al., 2020; Nishi et al.,  
54 2003; Rivas et al., 2020). The Aat system requires five proteins (AatPABCD) to facilitate protein  
55 secretion, two of which bear resemblance to components of the Type 1 secretion system (T1SS); an  
56 outer membrane protein (OMP), and a periplasmic adaptor protein (PAP). In contrast to the T1SS, the  
57 CexE and Aap substrate molecules are translocated using a two-step mechanism. First Aap/CexE is  
58 translocated across the inner membrane into the periplasm by the Sec pathway (Pilonieta et al., 2007).  
59 It then enters the Aat system to be secreted across the outer membrane (Belmont-Monroy et al., 2020;  
60 Nishi et al., 2003; Rivas et al., 2020).

61 While further characterising the two-step secretion mechanism of the Aat system, we noticed  
62 that during secretion CexE is post-translationally modified by the Aat system and this modification is  
63 required for the secretion. Here we reveal that following cleavage of the Sec-dependent signal sequence,  
64 the N-terminus of CexE is modified by the addition of an acyl chain. We demonstrate that AatD is a  
65 homolog of the apolipoprotein N-acyltransferase (Lnt). We reveal AatD is both necessary and sufficient  
66 for monoacylation of CexE and Aap. However, in contrast to Lol lipoprotein substrates, CexE lacks an  
67 N-terminal cysteine and instead an invariant glycine is the site of acylation. Furthermore, we  
68 demonstrate that the addition of an N-terminal glycine to the coding sequence of a heterologous protein  
69 was sufficient for this novel AatD-catalysed acylation event. We propose that Aap and CexE are  
70 members of a novel class of lipoprotein that are secreted through the Aat system, which is a  
71 conglomeration of the Lol pathway and a T1SS. Thus, we describe a new mechanism of N-  
72 palmitoylation. We reveal glycine as a new target of N-palmitoylation and AatD is a new  
73 acyltransferase. Consequently, we reveal a new function for acylation - protein secretion.

## 74 **Results**

### 75 **Distribution of the Aat system**

76 The Aat system was first identified in EAEC, where it corresponds to the molecular probe  
77 (CVD432) used to define this *E. coli* pathovar (Baudry et al., 1990; Nishi et al., 2003). In order to  
78 determine whether the Aat system was more widespread each of the Aat proteins from ETEC H0407  
79 was used to search the non-redundant protein sequence database using repetitive iterations of the PSI-

80 BLAST algorithm. The full Aat system and an Aap or CexE homolog was identified in 826 separate  
81 nucleotide accessions (Supplementary Table S1). This revealed that the Aat system is distributed more  
82 widely than initially anticipated and is encoded in pathogens with diverse mechanisms of virulence such  
83 as ETEC, EAEC, enteropathogenic *E. coli*, Shiga-toxin producing *E. coli*, *Shigella* sp., *Salmonella*  
84 *enterica*, *Citrobacter rodentium*, *Providencia alcalifaciens* and *Yersinia enterocolitica* (Crossman et al.,  
85 2010; Petty et al., 2010; Rivas et al., 2020).

86 To understand the conservation of the Aat system, the organisation of the *aat* operon was  
87 examined for each of the 826 genomes identified above. The relative genomic distance between each  
88 of the *aat* genes and *aap/cexE* was calculated from their boundaries on the nucleotide accession. From  
89 this analysis six separate organisations of the *aat* operon were identified (Fig 1). In the most common  
90 organisation *aap/cexE* are separated from the *aatPABCD* operon by at least 1 kb. This accounted for  
91 just over half of the *aat* systems identified. In just under a quarter of *aat* operons identified, *aap/cexE*  
92 are within 1 kb of the *aatPABCD* operon either within 400 bp upstream (18.4%) or 1 kb downstream  
93 (4.8%). In 25% of the *aat* systems identified *aatD* was separated from *aatPABC* by >1 kb. The most  
94 common of these organisations was *aatD* separated from the other members of the *aat* system and  
95 substrate protein (11.9%), closely followed by *aatD* and *aap/cexE* together but greater than 1 kb  
96 distance from for other *aat* genes (9.0%). Finally, in the least common example *aatD*, *aap/cexE* and  
97 *aatPABC* were all separated by greater than 1 kb (4.1%). We did not identify any examples of *aatD*  
98 encoded between 39 bp and 1 kb from the stop codon of *aatC*. However, despite these differences, in  
99 every example the *aatPABC* genes formed a single operonic unit located with *aatD* and *aap/cexE* on a  
100 chromosomal pathogenicity island or a large virulence plasmid. These data suggest that AatPABCD are  
101 sufficient and necessary to mediate Aap/CexE secretion.

## 102 **Aat-dependent secretion of CexE**

103 To test whether all of the *aat* genes are required for CexE secretion, we constructed single gene  
104 deletion mutants of *cexE* and each *aat* gene in ETEC H10407 pCfaD. The pCfaD plasmid encodes the  
105 CfaD transcriptional activator under the control of an arabinose inducible promoter allowing  
106 constitutive expression of the CfaD-dependent *cexE* and the *aat* genes in the presence of arabinose

107 (Hodson et al., 2017; Pilonieta et al., 2007). SDS-PAGE analysis of culture supernatant fractions  
108 collected from ETEC H10407 pCfaD revealed a protein with an apparent molecular mass of 11.8 kDa  
109 that could be detected by western blotting with CexE-specific polyclonal antibodies (Fig 2A). In  
110 contradistinction to the parent strain, no protein was detected in the culture supernatant fractions derived  
111 from cultures of the ETEC H10407 pCfaD *aat* or *cexE* mutants (Fig 2A). However, to ensure that the  
112 lack of CexE in the culture supernatant was not due to the lack of CexE production, but rather a result  
113 of an inability to secrete CexE, the presence of CexE in whole cell lysates was determined. CexE was  
114 detected by western blotting with CexE-specific antibodies in whole cell lysates of ETEC H10407  
115 pCfaD and all *aat* mutants. In contrast, CexE could not be detected in the *cexE* null mutant (Fig. 2A).  
116 From these data we conclude that the Aat system is essential for CexE secretion.

#### 117 **Post-translational modification of Aat substrate molecules**

118 Unexpectedly, when the whole cell lysates of ETEC H10407 pCfaD and its isogenic *aat*  
119 mutants were examined by western blotting, CexE appeared as two bands in the parental strain and each  
120 of the *aat* mutants except for *aatD* (Fig. 2B). The upper band had an apparent molecular mass of 12.7  
121 kDa (uCexE) while the lower band (mCexE) had an apparent molecular mass of 11.8 kDa, which is  
122 consistent with the secreted form of CexE recovered from the supernatant fractions. As CexE is  
123 exported into the periplasm by the Sec pathway (Pilonieta et al., 2007), the inefficient cleavage of a  
124 signal peptide could be responsible for the difference in the molecular mass of uCexE compared to  
125 mCexE. To investigate this, ETEC H10407 pCfaD was grown in the presence of sodium azide. Sodium  
126 azide inhibits SecA to prevent translocation of proteins across the inner membrane and subsequent  
127 cleavage of the signal peptide (Huie & Silhavy, 1995; Oliver et al., 1990). In the absence of sodium  
128 azide the mCexE and uCexE forms could be detected in whole cell lysates as observed previously (Fig  
129 2B and C). However, in the presence of sodium azide a protein (proCexE) with an apparent molecular  
130 mass of 13.2 kDa was detected (Fig. 2C). These observations suggest that the difference in molecular  
131 mass between uCexE and mCexE was not due to inefficient cleavage of the signal peptide but was due  
132 to a post translational event mediated by AatD.

133 A size change in the CexE homolog Aap has not been reported before despite numerous  
134 investigations of the Aat system. To determine whether the migration of Aap was altered by AatD, the  
135 effect of an *aatD* deletion on the apparent size of Aap was investigated in EAEC 042. EAEC 042, an  
136 *aap* mutant, an *aatD* mutant and an *aatD* mutant complemented with pJNW were grown in DMEM-  
137 HG; the pJNW plasmid encodes the complete *aat* operon from EAEC 042. Whole cell lysates of each  
138 strain were analysed by SDS-PAGE. As noted above for CexE, the deletion of *aatD* in EAEC 042  
139 resulted in an apparent increase in size of Aap (Fig 2D). The size change of Aap in the *aatD* mutant  
140 could be restored to the wild-type size by complementation with the pJNW plasmid. From these data  
141 we conclude that AatD can modify Aap and CexE post-translationally and that this modification is  
142 required for secretion of the mature substrate molecule to the extracellular milieu.

### 143 **Predicted functions of Aat components**

144 To assist our understanding of the contribution of each Aat component to the secretion of CexE  
145 we constructed hidden Markov-models (HMM) for individual Aat proteins. These were used to search  
146 the Uniprot database for distant homologs. In agreement with previous publications, AatA is a homolog  
147 of the trimeric outer membrane protein TolC (Supplementary Fig S1) and AatB is a periplasmic adaptor  
148 protein (Supplementary Fig S2), components associated with T1SS and drug efflux pumps (Nishi et al.,  
149 2003). In contrast, AatD was not homologous to any T1SS or efflux-associated proteins. Instead, AatD  
150 was homologous to apolipoprotein N-acyltransferase (Lnt), which is a member of the carbon-nitrogen  
151 hydrolase (C-N hydrolase) family (PF00795) required for bacterial lipoprotein acylation and transport  
152 via the Lol system (Fig 3A). Comparison of the C-N hydrolase domain of AatD with other members of  
153 PF00795 revealed that AatD forms a clade with Lnt suggesting that they are functionally related. The  
154 ATPase domain of AatC is part of a clade containing the ATPase domains of LolD, the ATPase subunit  
155 of the LolCDE lipoprotein transporter (Fig 3B). Similarly, AatP is more closely related to LolC and  
156 LolE than typical ABC transporters of the T1SS, such as HlyB (Fig 3C). The homology of AatP, AatC,  
157 and AatD to proteins of the Lol pathway suggests that the Aat system is a composite system of a T1SS  
158 and the Lol lipoprotein trafficking system.

### 159 **AatD-mediated acylation of mCexE**

160 As AatD is a homolog of the Lnt acyltransferase, we hypothesised that mCexE represents an  
161 acylated form of CexE. To test this hypothesis, we used 17-ODYA, an 18-carbon alkyne fatty acid that  
162 can be conjugated to an azide linked fluorescent molecule by a copper(I)-catalyzed azide-alkyne  
163 cycloaddition (CuAAC) reaction to investigate CexE lipidation. The *cexE* gene was introduced into a  
164 *cexE* mutant or a *cexE aatD* double mutant on a plasmid termed pACYC-*cexE*-6His, which encodes  
165 *cexE* under the transcriptional control of its native promoter. This allowed production of a C-terminally  
166 His-tagged variant of CexE. Both strains harbouring pACYC-*cexE*-6His were grown in the presence or  
167 absence of 17-ODYA. The bacterial lipoprotein YraP, was included as a positive control. CexE and  
168 YraP were isolated from each culture by virtue of their C-terminal 6xHis-tag by using nickel affinity  
169 chromatography. The purified proteins were then linked to an azide derivative of Alexa Fluor 488 using  
170 a CuAAC reaction. After the CuAAC reaction the CexE and YraP samples were separated by SDS-  
171 PAGE and fluorescence was measured (Fig 4). In the presence of AatD and 17-ODYA CexE was  
172 fluorescently labelled; in the absence of either 17-ODYA or AatD no fluorescence was observed.  
173 Moreover, only mCexE was labelled indicating that uCexE is an unacylated form of CexE; counter  
174 intuitively, the acylated form (mCexE) migrates faster on SDS-PAGE than the unacylated uCexE. As  
175 acylated proteins associate with membranes, we examined the cellular compartmentalisation of mCexE  
176 (Supplementary Fig S3). ETEC H10407 pCfaD and isogenic *aat* mutants were grown in LB  
177 supplemented with L-arabinose. Subsequently, cells were collected by centrifugation, lysed and the  
178 total membrane fraction was harvested by centrifugation. After separation by SDS-PAGE, only mCexE  
179 was detectable by western blotting in the membrane fraction of the parent strain and the *aatPABC*  
180 mutants; no mCexE could be detected in the membranes recovered from the *aatD* mutant  
181 (Supplementary Fig S3). In contrast, both mCexE and uCexE could be detected in whole cell lysates of  
182 ETEC H10407 pCfaD and only uCexE could be detected in whole cell lysates of the *aatD* mutant. These  
183 data suggest that AatD is an acyltransferase that mediates post-translational modification of CexE by  
184 the addition of one or more acyl chains.

185 To determine whether AatD was sufficient to mediate the acylation of mCexE, plasmids  
186 encoding AatD and CexE were introduced into the laboratory strain *E. coli* BL21(DE3), which does not  
187 encode any of the Aat proteins or Aap/CexE. *E. coli* BL21 was transformed with pET26b-*cexE* and



188 pACYC-*aatD* or their respective empty vector controls pET26b and pACYCDuet-1. These strains were  
189 grown in LB and the production of AatD and CexE was induced by IPTG. The production of CexE was  
190 monitored via western blotting (Fig 5). CexE was not detected in strains that contained pET26b. uCexE  
191 was produced in the absence of AatD at the size expected for the unmodified form after cleavage of the  
192 signal sequence. However, when CexE and AatD were produced together, mCexE migrated further (Fig  
193 5). These data suggest AatD was solely responsible for the modification of CexE.

#### 194 **Catalytic residues of AatD**

195 The C-N hydrolase family of proteins have a known conserved catalytic triad, which in the case  
196 of Lnt is E267, K335, and C387. Another Lnt residue E343 helps to stabilise the catalytic site (Vidal-  
197 Ingigliardi et al., 2007). Mutation of any of these residues to alanine results in a loss of Lnt function  
198 (Gélis-Jeanvoine et al., 2015). To assess the conservation of the catalytic residues the AatD sequence  
199 of EAEC 042 and ETEC H10407 and Lnt from *E. coli* MG1655 were aligned using Clustal Omega.  
200 Each of the residues associated with the catalytic site were conserved in both versions of AatD (Fig  
201 6A). The C-N hydrolase catalytic triad is conserved in AatD: E217; K278; and C325. Also, Lnt E343  
202 is conserved at position E286 in AatD. Further AatD sequences were identified using PSI-BLAST.  
203 These sequences were aligned and a WebLogo was produced for the regions flanking each of the  
204 catalytic residues; the four residues were 100% conserved in all AatD sequences identified. In addition,  
205 when a structure of AatD predicted by Phyre2 (Kelley et al., 2016) was compared to Lnt (PDB: 5N6L)  
206 (Wiktor et al., 2017) the four AatD residues (E217, K278, E286, and C325) were superimposed on the  
207 Lnt catalytic triad suggesting that these residues were required for acylation of CexE (Fig 6B and 6C).  
208 To test this hypothesis, pACYC-*aatD* derivatives encoding mutant derivatives of AatD with alanine  
209 substitutions at the conserved E217, K276, E286, or C325 were introduced into *E. coli* BL21(DE3)  
210 pET26b-*cexE*. Expression of AatD and CexE were induced by the addition of IPTG during growth in  
211 LB. As expected, mCexE was only present in the strain encoding the wild-type *aatD* sequence whereas  
212 only unmodified uCexE was detected in mutants harbouring the E217A, K276A, E286A, or C325A  
213 (Fig 6D). These observations suggest that the mechanism of protein acylation by AatD and Lnt are  
214 similar.

## 215 **An N-terminal glycine is required for acylation**

216 Due to the homology and functional similarity between AatD and Lnt, a likely site for acylation  
217 of CexE is the N-terminal amino acid immediately after the signal sequence. SignalP predictions  
218 suggested that CexE possesses a Sec-dependent signal sequence cleaved by Signal Peptidase I between  
219 alanine at position 19 and glycine at position 20 (Fig. 7A and Supplementary Table S2). N-terminal  
220 amino acid sequencing of uCexE revealed the amino acid sequence GGGNS confirming that glycine at  
221 position 20 formed the N-terminal amino acid of the processed protein. However, bioinformatic  
222 analyses of the amino acid sequences of 224 distinct CexE homologs failed to identify in their signal  
223 sequences the presence of a ‘lipobox’ (Supplementary Fig S4); lipoboxes are required for recognition  
224 of lipoproteins by the Lol system and thus acylation by Lnt (Babu et al., 2006). Further analyses  
225 revealed limited sequence identity between the signal sequences of the 224 CexE homologs indicating  
226 that an alternative lipobox is not present. Moreover, neither CexE nor any other homolog possessed a  
227 cysteine residue adjacent to the signal sequence; for bacterial lipoproteins the N-terminal cysteine of  
228 the mature protein is the target of Lnt mediated acylation. Since CexE does not contain features of a  
229 typical bacterial lipoprotein it must be recognised and acylated by AatD in a manner different to the  
230 acylation of lipoproteins by Lnt.

231 Further scrutiny of the amino acid sequences of all CexE homologs revealed that for all CexE  
232 and Aap proteins the first five amino acids immediately after the signal peptide cleavage site are a  
233 conserved mix of glycine and serine residues (Fig 7B). The presence of an invariant N-terminal glycine  
234 residue immediately downstream of the predicted signal sequence suggested that this might be the site  
235 of acylation. To test this hypothesis, we mutated each of the N-terminal residues of CexE to glutamic  
236 acid and observed the effect on acylation by western blotting. The amount of total fluorescence of the  
237 secondary antibody bound to primary polyclonal anti-CexE antibody was measured and compared for  
238 each mutant. The percentage of acylated mCexE was calculated for each mutant. The migration of the  
239 G20E mutant was similar to uCexE indicating that the change to glutamic acid completely abolished  
240 acylation (Fig 7C). In addition, the acylation of the G21E mutant was significantly reduced (p-value =  
241 0.0013). However, there was no significant reduction in acylation of the G22E, N23E or S24E mutants

242 (Fig 7C). These data indicate that the acylation of CexE is highly dependent on the N-terminal glycine  
243 at position 20 and to a lesser extent on the second glycine at position 21.

#### 244 **Mass spectrometry analysis of CexE acylation**

245 Mutation of the conserved N-terminal glycine can abolish acylation of CexE, and Lnt acylates  
246 the N-terminal amine of the signal peptidase processed lipoprotein, therefore we hypothesised that AatD  
247 would acylate the N-terminal amine of G20. To test this, we first purified his-tagged mCexE and uCexE  
248 by nickel affinity chromatography. Both forms of CexE were subjected to trypsin digestion followed  
249 by LC-MS/MS. A peak was observed in the HPLC trace of mCexE that was not present in uCexE (Fig  
250 8A). The mass spectrometry of that peptide identified the five N-terminal residues of CexE with an  
251 addition of 238 Da, which is equal to that expected to a single 16 carbon fatty acid addition (Fig 8B)  
252 confirming the modification of CexE by the addition of an acyl chain onto the N-terminal glycine.

#### 253 **Heterologous acylation by AatD**

254 Other domains of CexE might be responsible for interacting with AatD other than the N-  
255 terminus. Therefore, we fused the N-terminus of mCherry with the signal sequence of CexE and an  
256 increasing number of glycine residues to a maximum of three. These constructs were transformed into  
257 ETEC H10407 $\Delta$ *cexE* pCfaD and the production of the mCherry fusions was induced in culture media  
258 supplemented with 17-ODYA. The mCherry constructs with N-terminal glycine residues were isolated  
259 using the incorporated C-terminal 8xHis tag. The purified proteins were subjected to CuAAC with  
260 azide-Cy5. The incorporation of 17-ODYA into the mCherry fusions was observed by detecting  
261 fluorescence of the Cy5 dye. The signal sequence alone did not cause an incorporation of 17-ODYA  
262 (Fig 9). However, a single glycine at the N-terminus was sufficient for mCherry acylation but the  
263 addition of further glycine residues to the N-terminus increased the fluorescence signal indicating an  
264 increase of AatD activity proportional with increase in the number of glycine residues present (Fig. 9).  
265 The minimum required for AatD-mediated acylation is a glycine at the N-terminus of the protein post  
266 signal sequence. However, an increase in the number of glycine residues appears to increase the  
267 efficiency of the reaction.

## 268 Discussion

269 Post-translational modification of proteins by the covalent attachment of fatty acids occurs for a  
270 myriad of proteins in eukaryotic and prokaryotic organisms. Such acylation events confer distinct  
271 biochemical properties on the proteins, enabling acylation to regulate intracellular trafficking,  
272 subcellular localization, and molecular interactions. The current dogma for Gram-negative bacterial  
273 lipoproteins purports that proteins are triacylated on an N-terminal cysteine through the action of three  
274 enzymes Lgt, Lsp and Lnt (Grabowicz, 2019; Nakayama et al., 2012; Zückert, 2014). To our knowledge  
275 there are no examples of bacterial proteins where acylation occurs on N-terminal glycine residues.  
276 While N-terminal glycine acylation by N-myristoyltransferase is present in life it is restricted to  
277 eukaryotes. N-myristoylation is one of the three major classes of fatty acylation reactions for eukaryotic  
278 proteins, which include: N-myristoylation of glycine/lysine in proteins such as c-Src or HIV Gag1  
279 (Resh, 1994; Veronese et al., 1988); S-palmitoylation of cysteine in proteins such as Ras (Hancock et  
280 al., 1989); and N-palmitoylation of cysteine in proteins such as Hedgehog (Pepinsky et al., 1998).  
281 Examples of bacterial N-myristoylation rely on eukaryotic proteins produced in *E. coli* or the injection  
282 of myristoylatable proteins into eukaryotic cells by type 3 secretion systems (Duronio et al., 1990;  
283 Martin et al., 2011). To our knowledge this is the first report of enzyme mediated N-palmitoylation in  
284 nature. The recent publication by Belmont-Monroy *et al.* 2020 independently identified AatD as an  
285 acyltransferase of Aap and CexE.

286 The Aat system is, to our knowledge, the only secretion system that acylates and secretes a  
287 lipoprotein substrate to the cell surface. While surface exposed lipoproteins have been reported for *E.*  
288 e.g. Lpp, RcsF, and SslE (Baldi et al., 2012; Cowles et al., 2012; Konovalova et al., 2014), these  
289 lipoproteins are acylated by Lgt and Lnt on an N-terminal cysteine in the typical manner and  
290 translocated to the outer membrane by the Lol pathway. Similarly, *Neisseria* spp. decorate their cell  
291 surfaces with secreted lipoproteins that are acylated by Lgt and Lnt on an N-terminal cysteine and  
292 trafficked to the outer membrane by the Lol system. In the latter case an outer membrane protein termed  
293 Slam is required for translocation of the protein to the cell surface (Hooda et al., 2016). In contrast, the  
294 Aat system encodes a novel and specialised N-acyltransferase, AatD. To allow secretion of the novel  
295 lipoprotein CexE the Aat system has combined proteins of the T1SS and the Lol trafficking pathway.

296 Not only does the Aat system secrete a novel class of lipoproteins from the periplasm to the surface of  
297 the cell but also it acylates that protein itself. For this reason, we believe that reclassification of the Aat  
298 system as the first example of the Lipoprotein Secretion System (LSS) is warranted. We propose that  
299 the LSS would remain as a sub-class of the T1SS to emphasise its similarities to the T1SS.

300 In Fig 10, we propose our model for Aat mediated secretion. First, the Sec machinery secretes  
301 preCexE into the periplasm, resulting in cleavage of the signal peptide by Signal Peptidase I to form  
302 uCexE (Pilonieta et al., 2007). Once in the periplasm the N-terminal glycine of uCexE is acylated by  
303 AatD to create mCexE. Through this acylation event mCexE then associates with the inner membrane.  
304 We believe this to be first step for secretion by the Aat system since CexE acylation by AatD is  
305 independent of the other members of the Aat system. In addition, the deletion of any of the *aatPABC*  
306 genes does not result in a loss of CexE acylation. We propose that the acylation of CexE is required to  
307 enter the AatPABC tunnel. Due to the homology to LolCDE, we believe that mCexE is extracted from  
308 the inner membrane by AatPC. Finally, AatA, AatB and AatPC form a channel for mCexE secretion in  
309 a manner analogous to a typical T1SS. Subsequently, mCexE inserts into the outer leaflet of the outer  
310 membrane.

311 The Aat system is not unique in secreting a periplasmic substrate. Other T1SS employ a two-  
312 step secretion mechanism. One such example is the MacAB-TolC complex which secretes heat-stable  
313 enterotoxin from the periplasm (Yamanaka et al., 2008). We identified MacA and MacB as homologs  
314 of AatB and AatPC, respectively. Suggesting that AatPC may use a similar mechanism of  
315 mechanotransmission as MacB to secrete Aap/CexE (Crow et al., 2017). Furthermore AatB may form  
316 a similar gating ring to MacA (Fitzpatrick et al., 2017). However, how the Aat system is able to combine  
317 the mechanism of the MacAB-TolC T1SS and the LolCDE lipoprotein trafficking pathway has yet to  
318 be elucidated.

319 Belmont-Monroy *et al.* 2020 suggested that Lnt is able to acylate Aap. However, in our hands  
320 there was no evidence of CexE acylation in the absence of AatD. Given that Aap and CexE lack the  
321 traditional lipobox of bacterial lipoproteins that would be recognised by the Lol system, that the signal  
322 sequence of all Aap and CexE peptides were predicted to be cleaved by Signal Peptidase I, which has  
323 been confirmed experimentally for CexE (Pilonieta et al., 2007), and we were able to reconstruct AatD

324 acylation in *E. coli* BL21(DE3) which does not naturally encode AatD or CexE but does encode Lnt,  
325 we do not believe that Lnt plays a role in CexE acylation. Indeed, our demonstration of acylation of a  
326 heterologous protein with a single glycine residue (Fig 10) suggests that AatD is a specific N-  
327 acyltransferase that has the potential for exploitation for production of novel acylated peptides in *E.*  
328 *coli*. The addition of an acyl chain can improve the half-life of peptide drugs like insulin (Kurtzhals,  
329 2007). Since we have shown that it is possible to reconstitute AatD acylation in a laboratory strain of  
330 *E. coli* there are further biotechnological applications to be explored.

331         Due to increasing levels of antibiotic resistance in pathogenic organisms there is a requirement  
332 for new protein targets. The conservation of this system within pathogenic bacterial strains represents  
333 a possible new drug target. Previous studies have shown that deletion of *aatD*, *aatC*, or *aap/cexE*  
334 reduces bacterial colonisation and disease (Belmont-Monroy et al., 2020; Rivas et al., 2020). Thus,  
335 chemicals targeting the Aat system have the potential to prevent or perhaps reduce the severity of  
336 bacterial disease. As the Aat system does not appear to be present in non-pathogenic strains this would  
337 be an ideal target to prevent off-target effects. As only pathogenic bacteria would be affected by the  
338 inhibition of the Aat system, there would be no risk of evolving resistant alleles in non-pathogenic  
339 populations.

340         In conclusion, we have identified a novel N-acyltransferase. In addition, we have characterised  
341 a novel class of bacterial lipoproteins that are acylated and secreted by a composite secretion system.  
342 There are still significant questions left to be answered on the mechanism of Aat secretion as well as  
343 the function of the secreted proteins. In addition, the ability to acylate heterologous proteins with a  
344 simple glycine addition is a valuable new tool for the biotechnology enabling new acylated peptides to  
345 be produced in *E. coli*.

346 .

## 347 **Materials and methods**

### 348 **Bacterial cultivation**

349 Supplementary Table S3 contains the bacterial strains used in this study. Bacterial strains were regularly  
350 cultivated in lysogeny broth (LB) which consisted of 10 g/L tryptone, 5 g/L yeast extract and 10 g/L  
351 NaCl. Bacterial strains were routinely grown on LB supplemented with 1.25% agar (LBA), and a single  
352 colony was used to inoculate liquid cultures for overnight growth at 37°C with aeration. Overnight  
353 cultures were used to inoculate Erlenmeyer flasks containing a fifth of their total volume of LB  
354 supplemented with the relevant antibiotics, and grown at 37°C with aeration. Antibiotics were used at  
355 the following final concentrations: kanamycin 100 µg/ml; carbenicillin 100 µg/ml; and  
356 chloramphenicol 35 µg/ml. For the induction of CexE in ETEC H10407, cultures harbouring pCfaD  
357 were grown for 90 minutes in LB, supplemented with carbenicillin, at 37°C with aeration. Expression  
358 of *cfaD* was induced with 0.2% L-arabinose for 2 hours at 37°C with aeration. Aap was induced by  
359 growing EAEC 042 in DMEM-HG with aeration at 37°C.

### 360 **Molecular techniques**

361 Primers for PCR can be found in Table S4. Plasmids used in this study are detailed in Table S5. Unless  
362 otherwise stated all primers were used at a concentration of 10 µM. Q5® High-Fidelity 2X Master Mix  
363 (NEB) was used for cloning or mutagenesis. MyTaq™ Red Mix (Bioline) was used in all other cases.  
364 The *cexE* gene from ETEC H10407 was amplified using CcexE-F and CcexE-R primers. Both the  
365 vector, pET26b(+) (Novagen), and the insert were cut with NdeI (NEB) and XhoI (NEB) using the  
366 CutSmart® (NEB) protocol. The digested vector was treated with Antarctic Phosphatase (NEB). T4  
367 DNA Ligase (NEB) was used to ligate the insert DNA to the vector DNA. The ligation mixture was  
368 transformed into NEB® 5-alpha Competent E. coli (High Efficiency). Recovered cells were plated on  
369 LBA supplemented with 100 µg/ml kanamycin and incubated at 37°C overnight. The *cexE* gene and  
370 573 bp upstream of the *cexE* gene, which included the two CfaD binding sites (Pilonieta et al., 2007),  
371 was amplified by PCR. The reverse primer included a 6His tag. The resulting amplified DNA was  
372 digested with SphI and BamHI and ligated into pACYC184. Successful ligations were selected for as

373 described above on LBA supplemented with 35 µg/ml chloramphenicol. Point mutations were  
374 constructed using the QuickChange II method (Aglient). The *aat* genes and *cexE* were disrupted in  
375 ETEC H10407 as previously described (Datsenko & Wanner, 2000). The plasmid pDOC-K was used  
376 as the source of the kanamycin resistance cassette (Lee et al., 2009). The *cexE*-mCherry fusion and the  
377 *aatD* gene from ETEC H10407 were synthesised by GenScript. Deletions of the *cexE* gene from the  
378 plasmid encoding the CexE-mCherry fusion were constructed as previously described (Moore &  
379 Prevelige, 2002). Plasmid sequences were confirmed by Sanger sequencing.

### 380 **Bioinformatic analysis of the Aat system**

381 The protein sequences of the Aat proteins from ETEC H10407 were used to search the NCBI non-  
382 redundant protein sequences database using PSI-BLAST (Altschul et al., 1997). Strains encoding a  
383 complete Aat system on the same nucleotide accession were used to assess the distance between *aat*  
384 genes. Distant homologs of the Aat proteins were identified using HMMER (Finn et al., 2011). An  
385 HMM was created for each Aat protein using the Aat protein sequences identified by PSI-BLAST.  
386 These models were used to search the UniprotKB or Swissprot databases (The UniProt Consortium,  
387 2019). Protein sequences were aligned using Clustal Omega (Madeira et al., 2019). RAxML was used  
388 for the construction of phylogenetic trees (Stamatakis, 2014). Trees were drawn using iTOL (Letunic  
389 & Bork, 2019).

### 390 **CexE purification for antibody production**

391 BL21(DE3) was transformed with pET26b-*cexE*. An overnight culture of BL21(DE3) pET26b-*cexE*  
392 was used to inoculate 2 L of LB supplemented with 100 µg/ml kanamycin. The culture was grown at  
393 37°C with aeration to an OD<sub>600</sub> of 0.4. The culture was moved to 20°C incubator for 30 min prior to  
394 induction. CexE production was induced with 50 µM Isopropyl β-D-1-thiogalactopyranoside (IPTG)  
395 (Sigma) and incubated overnight at 20°C with aeration. After overnight growth, cells were harvested  
396 by centrifugation at 6,000 x *g* for 10 min at 4°C. The cell pellet was resuspended in ice-cold binding  
397 buffer (50 mM NaP (77:33 ratio of Na<sub>2</sub>HPO<sub>4</sub> to NaH<sub>2</sub>PO<sub>4</sub>), 500 mM NaCl, 20 mM imidazole, 0.5 mM  
398 TCEP at pH 7.3). Cells were lysed using EmulsiFlex®-C3 (Avestin). Cellular debris and intact cells



399 were removed by centrifugation at 10,000 x *g* for 10 min at 4°C. The cellular membrane components  
400 were removed by centrifugation at 75,000 x *g* for 1 h at 10°C. The supernatant was applied to a  
401 HisTrap™ HP 5 ml column (GE Healthcare Life Sciences) overnight at 4°C. The column was washed  
402 with 5 column volumes of binding buffer then the protein was eluted in 5 ml fractions with elution  
403 buffer (50 mM NaP, 500 mM NaCl, 500 mM imidazole, 0.5 mM TCEP at pH 7.3). Samples containing  
404 purified protein were concentrated using Vivaspin® 6 5,000 MWCO columns (Sartorius Stedim).  
405 Protein was buffer exchanged using membrane filtration into 50 mM NaP, 250 mM NaCl and 0.5 mM  
406 TCEP at pH 7.3. Purified CexE protein was used to produce primary antibodies by Eurogentec using  
407 the 28-day speedy protocol. Polyclonal antibodies against CexE were concentrated prior to use for the  
408 detection of CexE.

#### 409 **Tris-Tricine SDS-PAGE and western blotting**

410 Protein samples were separated using tris-tricine SDS-PAGE as previously described (Schägger, 2006).  
411 In brief, protein samples were mixed with sample buffer (4% SDS, 2.5% 2-mercaptoethanol, 7.5%  
412 glycerol, 0.01% bromophenol blue, 35 mM Tris (pH 7.0)) and separated on 10% tris-tricine SDS-PAGE  
413 gels. Gels were stained with Coomassie brilliant blue or transferred to nitrocellulose for western  
414 blotting. Nitrocellulose membranes were covered in 2% BSA (20 g BSA, 2.42 g Tris-base (pH 8.4), 8  
415 g NaCl per L). The primary antibody was diluted in 2% BSA at the following concentrations: Aap 1 in  
416 5,000 (Sheikh et al., 2002); CexE 1 in 2,000 (this study); and  $\beta$  subunit of RNAP 1 in 10,000 (*E. coli*  
417 RNA Polymerase beta Monoclonal Antibody, BioLegend). Primary antibodies were incubated  
418 overnight at 4°C with agitation. Membranes were washed three times in TBST (2.42 g Tris-base, 8 g  
419 NaCl, 0.1% Tween-20, pH 8.4 in 1 L) for 5 min at room temperature with agitation prior to incubation  
420 with secondary antibody. Anti-Rabbit (IRDye 800CW Goat anti-Rabbit IgG, Li-Cor) or anti-mouse  
421 (IRDye 680LT Goat anti-Mouse IgG, Li-Cor) secondary antibodies were used to detect primary  
422 antibody binding. Secondary antibodies were diluted 1 in 15,000 in 2% BSA and incubated for a  
423 minimum of 1 h at room temperature with agitation. Membranes were washed 4 times with TBST for  
424 5 min at room temperature with agitation. Secondary antibody fluorescence was detected using the  
425 Odyssey CLx imaging system.

426 **Inhibition of SecA by sodium azide**

427 Two cultures of ETEC H10407 pCfaD were inoculated from the same overnight culture. The cells were  
428 both grown at 37°C for 90 min with aeration. WCL samples of each culture were taken. L-arabinose  
429 was added to both cultures to a final concentration of 0.2%. Sodium azide was added to a final  
430 concentration of 3 mM to one of the cultures. Both cultures were grown for 2 h at 37°C with aeration.  
431 WCL samples of each culture were taken and separated by tris-tricine SDS-PAGE. CexE was detected  
432 by western blotting.

433 **Proteomic analysis**

434 Cultures were grown under the conditions previously described for CexE production in ETEC H10407  
435 pCfaD. Cells were separated from the culture supernatant by centrifugation at 8,000 x g for 10 min at  
436 4°C. The culture supernatant was filtered using Millex-GP Syringe Filter Unit, 0.22 µm,  
437 polyethersulfone (Merck) then cooled on ice. Ice-cold 100% TCA was added to a final concentration  
438 of 20%. Samples were incubated on ice for 30 minutes. Proteins were pelleted by centrifugation. The  
439 supernatant was removed and discarded from the sample. The pellet was washed twice with 1 ml ice-  
440 cold 100% methanol, proteins were collected with centrifugation at 21,000 x g for 15 min at 4°C  
441 between each wash. The supernatant was removed and residual methanol was evaporated by incubating  
442 the sample at 60°C for 10 min. The pellet was resuspended in 50 µl tris-tricine sample buffer. If a colour  
443 change to yellow occurred saturated tris-base was added until the original colour returned. Samples  
444 were analysed by tris-tricine SDS-PAGE.

445 Membranes were extracted from 50 ml of cells grown under the conditions required for CexE  
446 production. Cells were collected by centrifugation and resuspended in 20 ml of 10 mM Tris (pH 8.0), 1  
447 mM PMSF (Phenylmethylsulfonyl fluoride). Cells were lysed using EmulsiFlex®-C3 (Avestin).  
448 Unlysed cells were collected by centrifugation at 5,000 x g for 10 minutes at 4°C. The supernatant was  
449 separated. The membranes were collected by centrifugation at 50,000 x g for 60 minutes at 4°C. The  
450 resulting membrane pellet was washed twice with ice-cold 10 mM Tris (pH 8.0). The final pellet was  
451 resuspended in 100 µl 10 mM Tris (pH 8.0). The samples were normalised by protein concentration.  
452 The membrane samples were separated by tris-tricine SDS-PAGE.

## 453 **CuAAC**

454 Overnight cultures harbouring plasmids encoding his tagged proteins of interest to be labelled were  
455 used to inoculate 25 ml LB supplemented with the relevant antibiotics to an OD<sub>600</sub> of 0.05. Cultures  
456 were grown for 1.5 h at 37°C. 17-ODYA dissolved in DMSO was added to a final concentration of 20  
457 µM and protein production induced. An equal volume of DMSO was added as a negative control. Cells  
458 were collected by centrifugation and resuspended in 600 µl of 50 mM NaP (pH 7.0), 150 mM NaCl,  
459 0.1% Triton X-100, and 1 mM PMSF. Cells were lysed by sonication for 15 min using the bioruptor on  
460 a 30 s on, 30 s off cycles. Insoluble material was removed by centrifugation at and the supernatant was  
461 retained. His tagged proteins were isolated from the supernatant using Dynabeads™ His-Tag Isolation  
462 and Pulldown (Invitrogen) as per the manufacturer's instructions. Imidazole was removed by dialysis.  
463 Protein sample concentrations were measured with Pierce™ BCA Protein Assay Kit (Thermo  
464 Scientific™). A master mix was prepared of 0.2 mM Cy5-azide (Sigma-Aldrich) or Alexa Fluor™ 488  
465 azide (Invitrogen), 0.2 mM tris[(1-benzyl-1H-1,2,3-triazol-4-yl)methyl]amine (TBTA), and 2 mM  
466 freshly prepared CuSO<sub>4</sub>. This was made to 50 µl in H<sub>2</sub>O and 5 µl of the master mix was added to 40 µl  
467 each normalised protein sample. Sodium ascorbate was added to a final concentration of 5 mM. Samples  
468 were incubated at 37°C for 1 h with agitation. Protein was precipitated using chloroform-methanol  
469 extraction. To each sample 400 µl MeOH, 150 µl chloroform, and 300 µl H<sub>2</sub>O were added and vortexed  
470 for 30 seconds. Samples were centrifuged at max speed for 2 min. The top layer was removed and 400  
471 µl MeOH was added and samples were centrifuged again at max speed for 2 min. The supernatant was  
472 removed, and the pellet was washed twice with 400 µl MeOH then dried. Pellets were resuspended in  
473 20 µl 1x tris-tricine sample buffer and separated by tris-tricine SDS-PAGE. Gels were incubated in  
474 fixative (10% acetic acid, 50% methanol) prior to fluorescence detection then stained with Coomassie  
475 Brilliant Blue.

## 476 **Heterologous protein acylation**

477 ETEC H10407 pCfaD was transformed with pRSF-GGG-mCherry, pRSF-GG-mCherry, pRSF-G-  
478 mCherry or pRSF-SS-mCherry. Cultures were grown as previously described for *cfaD* induction. At  
479 the same time as *cfaD* was induced 17-ODYA was added to a final concentration of 20 µM. Cells were

480 grown for 2 hours and harvested by centrifugation. 17-ODYA incorporation was detected as described  
481 above.

#### 482 **Mass spectrometry analysis of CexE acylation**

483 CexE with a 6 His tag was isolated from a cexE mutant and a cexE aatD double mutant of ETEC H10407  
484 pCfaD. The isolated CexE proteins were separated on a tris-tricine gel and stain with Coomassie  
485 brilliant blue. The band corresponding to uCexE and mCexE were excised and subjected to trypsin-  
486 LysC digestion. The tryptic peptide extracts were analyzed by nanoHPLC/MS MS/MS on an Eksigent,  
487 Ekspert nano LC400 uHPLC (SCIEX, Canada) coupled to a Triple TOF 6600 mass spectrometer  
488 (SCIEX, Canada) equipped with a PicoView nanoflow (New Objective, USA) ion source. 5 µl of each  
489 extract was injected onto a 5 mm x 300 µm, C18 3 µm trap column (SGE, Australia) for 5 min at  
490 10µL/minute. The trapped tryptic peptide extracts were then washed onto the analytical 75 µm x 150  
491 mm ChromXP C18 CL 3 µm column (SCIEX, Canada) at 400 nL/min and a column temperature of  
492 45°C. Solvent A consisted of 0.1% formic acid in water and solvent B contained 0.1% formic acid in  
493 acetonitrile. Linear gradients of 2-40% solvent B over 60 min at 400 nL/minute flow rate, followed by  
494 a steeper gradient from 40% to 90% solvent B in 5 min, then 90% solvent B for 5 min, were used for  
495 peptide elution. The gradient was then returned to 2% solvent B for equilibration prior to the next  
496 sample injection. The ionspray voltage was set to 2600 V, declustering potential (DP) 80 V, curtain gas  
497 flow 30, nebuliser gas 1 (GS1) 30, interface heater at 150°C. The mass spectrometer acquired 50 ms  
498 full scan TOF-MS data followed by up to 30 100 ms full scan product ion data, with a rolling collision  
499 energy, in an Information Dependant Acquisition, IDA, mode for protein identification and peptide  
500 library production. Full scan TOF-MS data was acquired over the mass range 350-1800 and for product  
501 ion MS/MS 100-1500. Ions observed in the TOF-MS scan exceeding a threshold of 200 counts and a  
502 charge state of +2 to +5 were set to trigger the acquisition of product ion, MS/MS spectra of the resultant  
503 30 most intense ions. The data was acquired and processed using Analyst TF 1.7 software (ABSCIEX,  
504 Canada). Protein identification was carried out using Protein Pilot 5.0 for database searching.

505

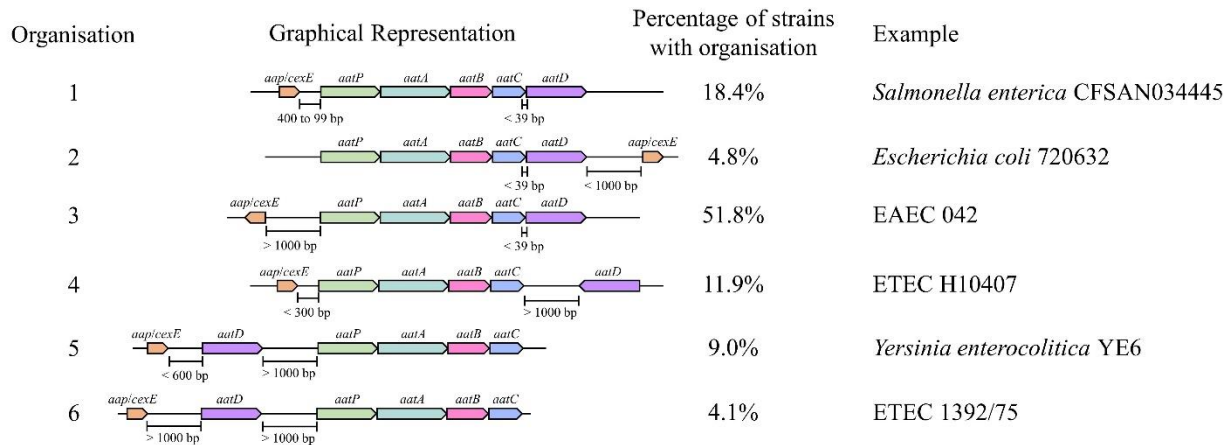

506

507 **Fig 1. Organisation of the Aat operon.** Unique Aat amino acid sequences were detected using PSI-  
 508 BLAST. These sequences were using to identify the strains that encoded them in the NCBI identical  
 509 protein groups. As the *aat* genes were present on contigs of whole genome sequencing projects it was  
 510 not possible to assess if a strain encoded a gene on the chromosome or plasmid. Instead contigs were  
 511 used to identify complete the complete Aat system. This analysis does not include strains that might  
 512 encode the *aat* genes or *aap/cexE* on a separate genomic element. However, a total of 827 complete Aat  
 513 systems were identified in the same nucleotide accession. The positions of these genes were used to  
 514 assess the organisation of the *aat* operon. From this assessment five different classes of *aat* operon  
 515 organisation were defined.

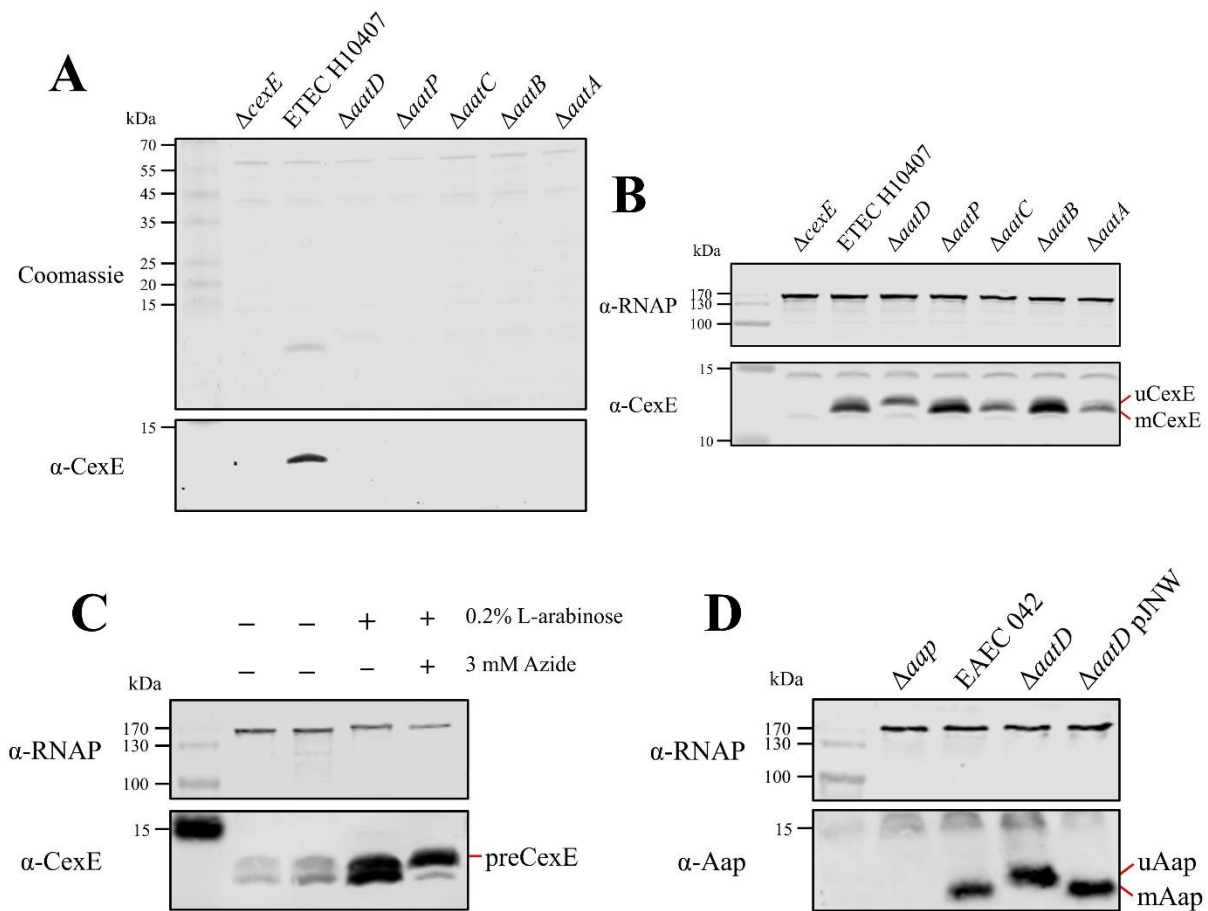

516

517 **Fig 2. AatD post-translational modification of Aap and CexE.** (A) Culture supernatant of ETEC  
 518 H10407 and *aat* mutants harbouring pCfaD grown in LB supplemented with L-arabinose. Cells were  
 519 removed from the culture supernatant and remaining protein precipitated with trichloroacetic acid.  
 520 Protein samples were separated by tris-tricine SDS-PAGE and stained with Coomassie or transferred  
 521 to nitrocellulose for western blotting with polyclonal antibodies against CexE. (B) Whole cell lysates  
 522 of the *aat* mutants and parental strain separated by tris-tricine SDS-PAGE. (C) Whole cell lysates of  
 523 ETEC H10407 grown in LB with or without azide. (D) Whole cell lysates of EAEC 042, *aap*, *aatD* and  
 524 *aatD* complemented strains grown in DMEM high glucose. The positions of uCexE, mCexE, uAap,  
 525 mAap, and preCexE are indicated as appropriate. CexE and Aap were detected by western blotting (α-  
 526 CexE and α-Aap, respectively) and RNA polymerase (α-RNAP) was included as a loading control  
 527 where appropriate.

528

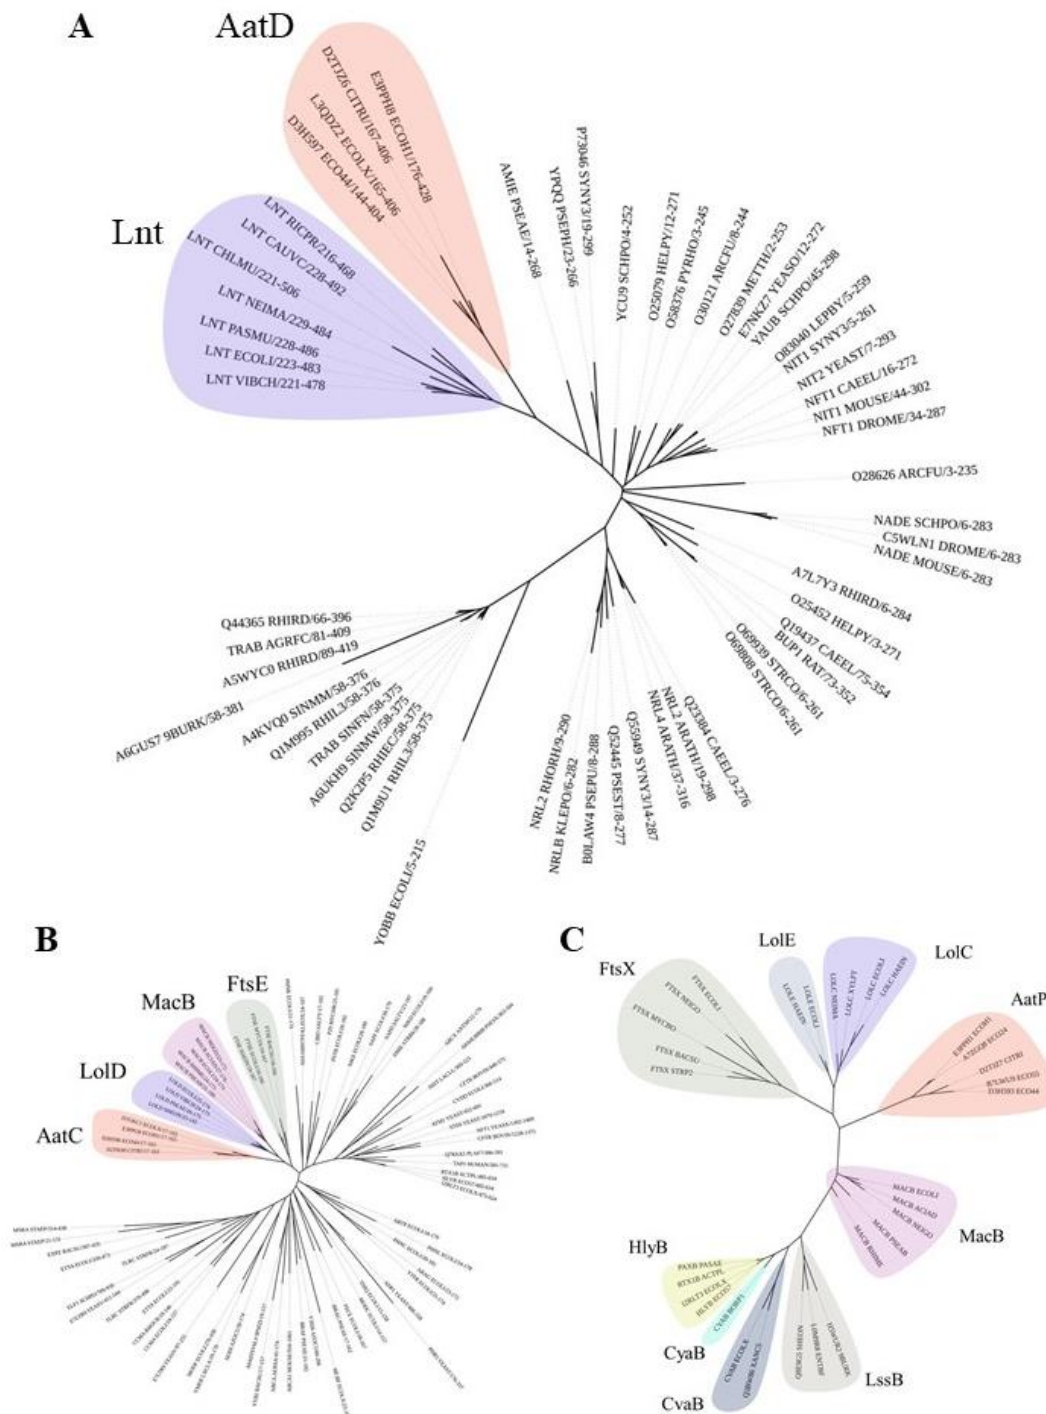

529

530 **Fig 3. Phylogenetic analysis of AatD, AatP and AatC.** Sequences were aligned using Clustal omega  
 531 and the tree was calculated using RAxML. **(A)** The C-N hydrolase domains of C-N hydrolase family  
 532 seed sequences of the were aligned to the C-N hydrolase domains of AatD sequences from ETEC  
 533 H10407, EAEC 042, *C. rodentium* ICC168, and *E. coli* KTE75. **(B)** Phylogram of the ATPase domains  
 534 of the pfam ABC transporters (PF00005) and AatC sequences. **(C)** Phylogram of T1SS ABC  
 535 transporters, Lol ABC transporters and AatP sequences.

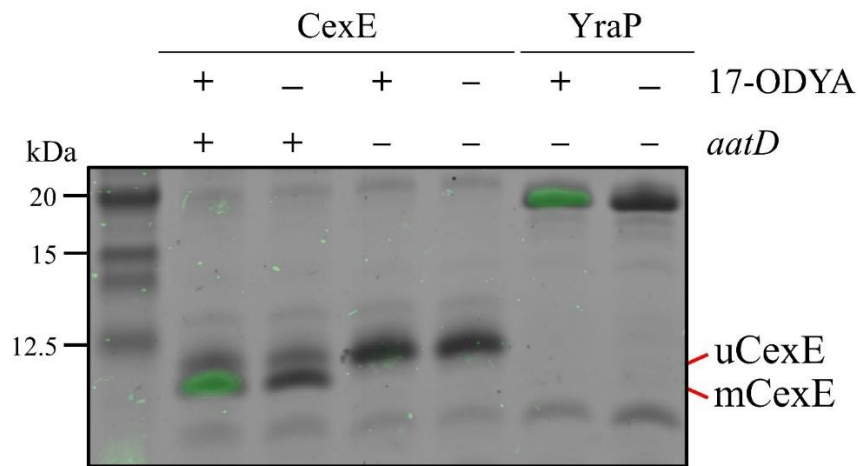

536

537 **Fig 4. Incorporation of 17-ODYA into CexE in the presence of AatD.** His tagged CexE was isolated  
538 from *cexE* or *cexE aatD* double mutants harbouring pACYC-*cexE*-6His grown in the presence or  
539 absence of 17-ODYA and separated by SDS-PAGE. An azide linked Alexa Fluor 488 was conjugated  
540 to the alkyne moiety present in 17-ODYA by CuAAC. The incorporation of 17-ODYA into the target  
541 protein was detected by fluorescence (green bands) and the image was overlaid on the image of the  
542 SDS-PAGE gel. A known lipoprotein YraP was used as a positive control.

543



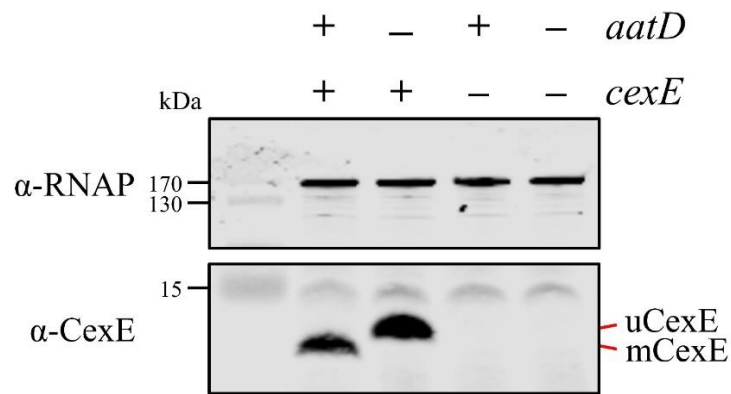

544

545 **Fig 5. Recapitulation of CexE acylation in *E. coli* BL21(DE3).** *E. coli* BL21(DE3) was transformed  
546 with pET26b, or pET26b-*cexE* and pACYCDuet-1 or pACYC-*aatD*. Cultures were grown in LB and  
547 protein production was stimulated with IPTG. Whole cell lysate samples were taken and separated by  
548 tris-tricine SDS-PAGE. CexE was detected using a polyclonal antibody. RNAP was used as a loading  
549 control. The position of mCexE and uCexE are indicated.

550

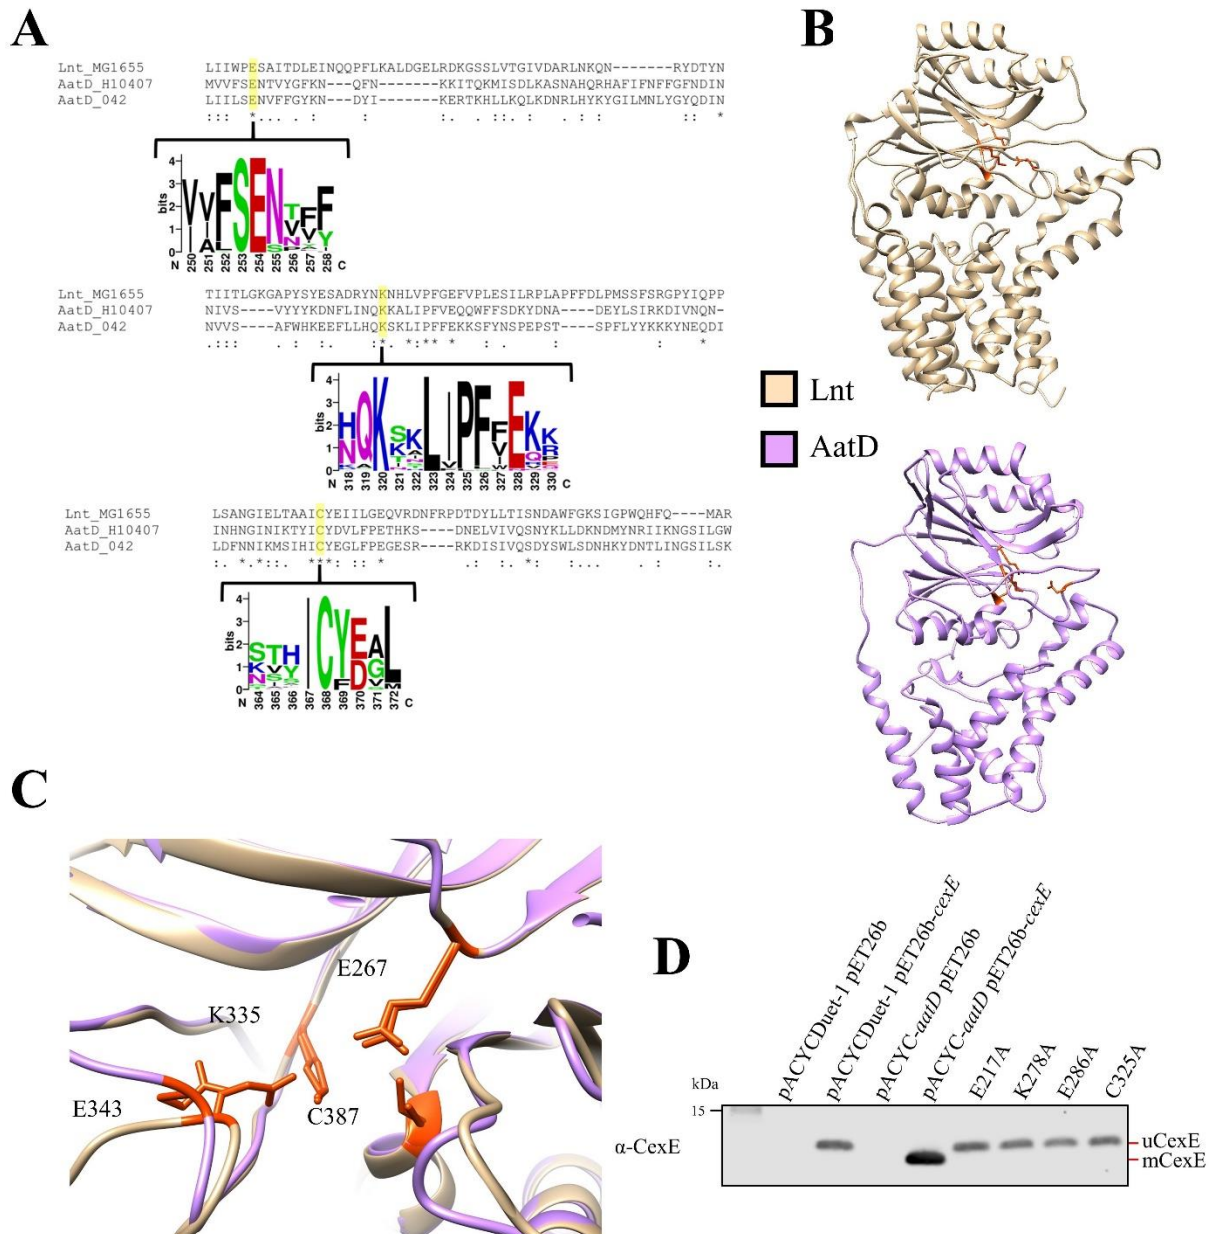

551

552 **Fig 6. Catalytic residues of AatD.** (A) AatD from EAEC 042 and ETEC H10407 were aligned with  
 553 Lnt from MG1655. AatD sequences identified by PSI-BLAST were aligned and used to create a  
 554 Weblogo. The catalytic residues of the C-N hydrolase family are highlighted. (B) The structure of Lnt  
 555 compared to the predicted structure of ETEC H10407 AatD. The catalytic residues of Lnt and AatD are  
 556 highlighted in orange. (C) Magnified view of the catalytic site of Lnt with the predicted structure of  
 557 AatD superimposed. (D) Residues are numbered as they appear in Lnt. *E. coli* BL21(DE3) was  
 558 producing CexE in the presence of each of the four single site substitution mutants of AatD. CexE was  
 559 detected using a polyclonal antibody.

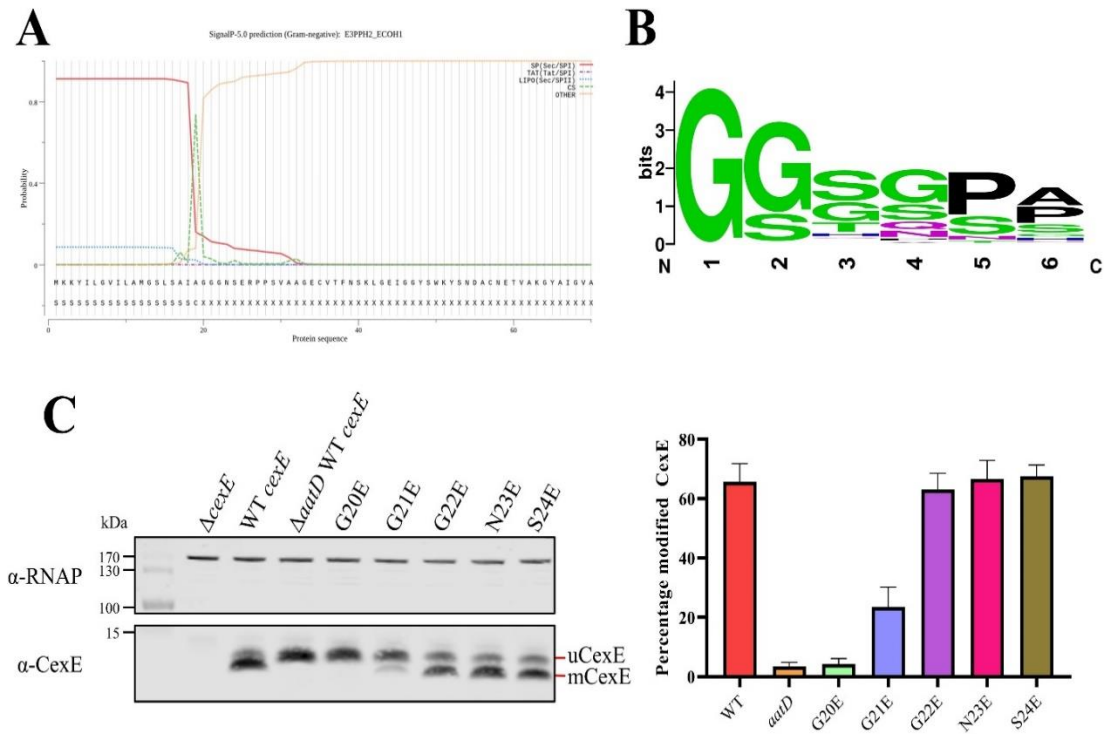

560

561 **Fig 7. Single site substitution of the 5 N-terminal amino acids of CexE.** (A) SignalP result of CexE  
 562 sequence from ETEC H10407 (E3PPH2\_ECOH1) (B) Weblogo of the 5 N-terminal residues of Aap  
 563 and CexE sequences post Sec signal sequence cleavage. (C) ETEC H10407 *cexE* mutants transformed  
 564 with pACYC184 ( $\Delta cexE$ ) or pACYC-*cexE*-6His with either the wild-type sequence (WT *cexE*) or one  
 565 of the first five amino acids mutated to glutamic acid. CexE was detected by polyclonal antibodies and  
 566 RNAP was used as a loading control. The percentage of mCexE was determined from 3 biological  
 567 replicates.

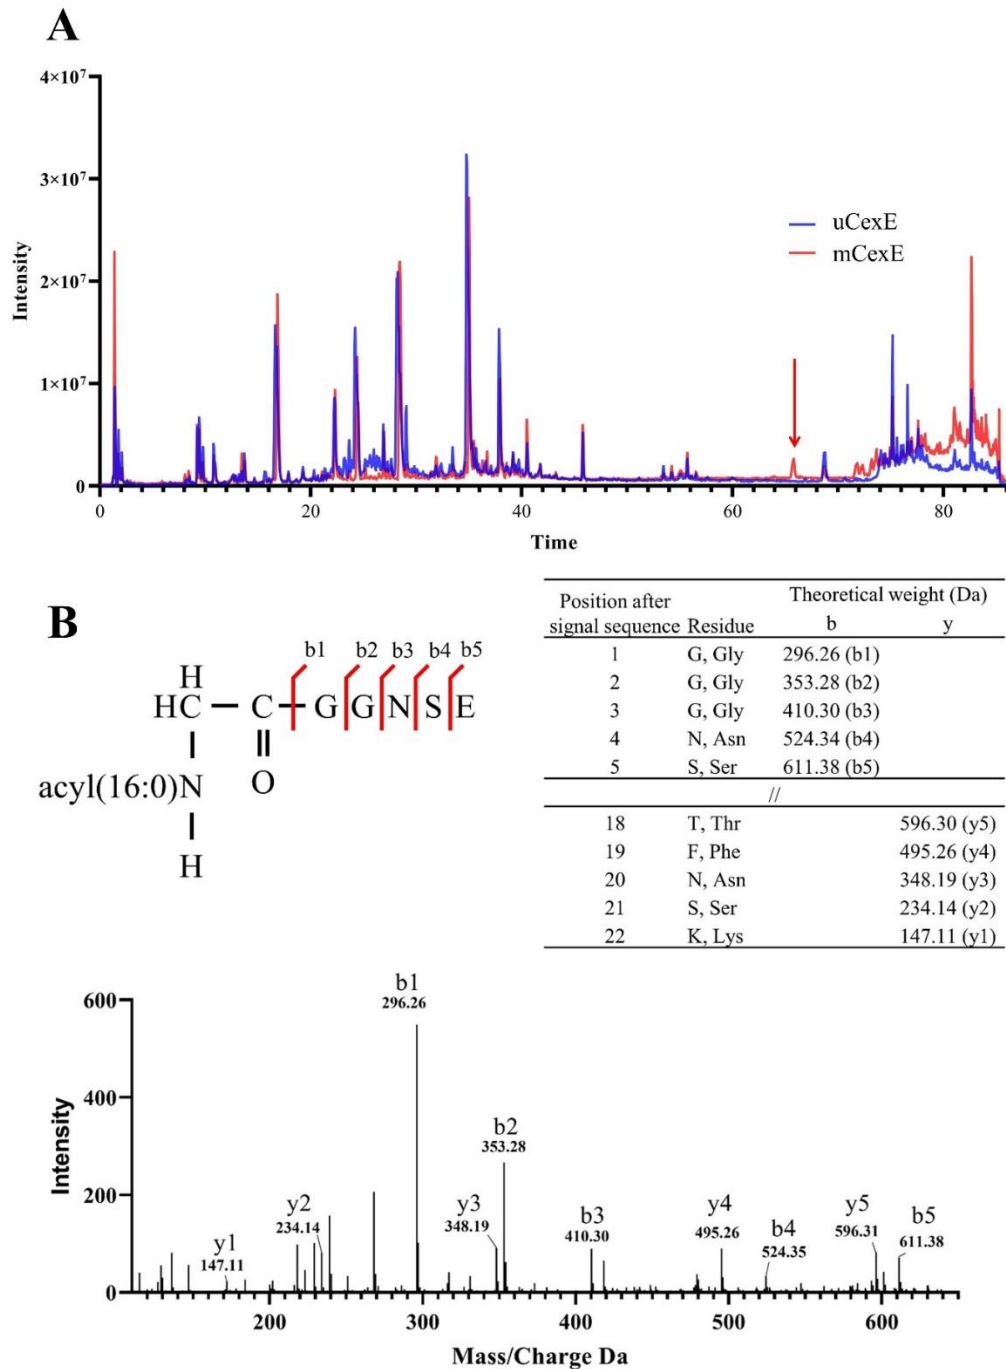

568

569 **Fig 8. Mass spectrometry analysis of modified CexE.** (A) CexE-6His was isolated from a *cexE* mutant  
 570 and a *cexE aatD* double mutant and subjected to LC-MS/MS. CexE and pro-CexE were trypsinated and  
 571 separated by HPLC. (B) The indicated peak was subjected to MS/MS to identify the amino acid  
 572 sequence.

573

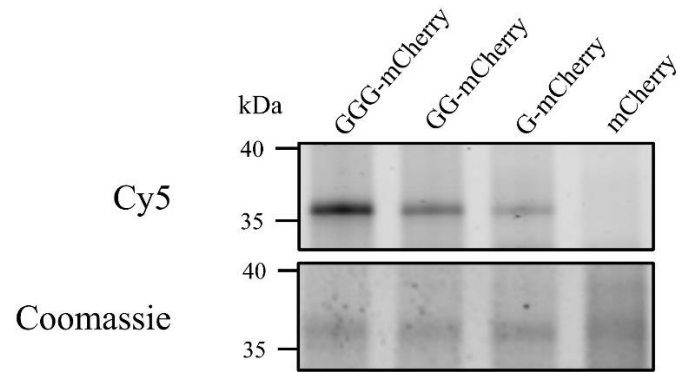

574

575 **Fig 9. Heterologous acylation by AatD** plasmid encoding mCherry with the CexE signal sequence  
576 followed by none, one (G), two (GG) or three (GGG) glycine residues post signal sequence was  
577 produced in an ETEC H10407 *cexE* mutant grown in the presence of 17-ODYA. The mCherry proteins  
578 were isolated using a C-terminal 8 His tag and azide linked Cy5 was incorporated into mCherry proteins  
579 using CuAAC. The acylation of mCherry was detected using fluorescence.

580

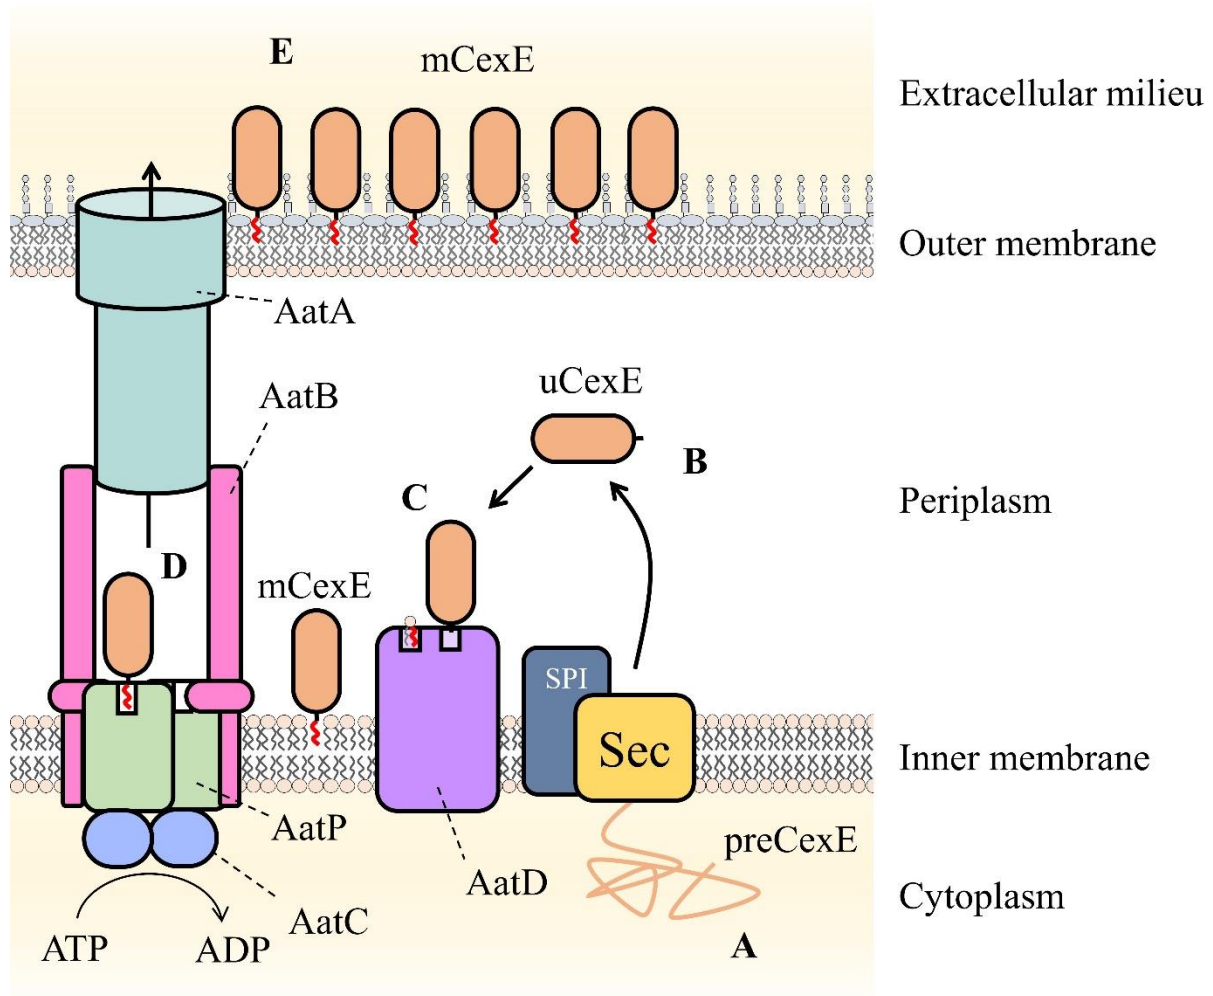

581

582 **Fig 10. Schematic of proposed Aat system mechanism.** A, preCexE produced in the cytoplasm is  
583 secreted into the periplasm by the Sec pathway (Sec). B, The signal sequence is cut by signal peptidase  
584 I (SPI) resulting in soluble uCexE. C, An acyl chain is added to the N-terminal glycine of uCexE by  
585 AatD. Accordingly, mCexE associates with the membrane. D, mCexE is extracted out of the inner  
586 membrane by the AatP and AatC complex. A single channel is formed comprised of AatP, AatA, AatB,  
587 and AatC that allows the secretion of mCexE. E, mCexE is inserted into the outer leaflet of the outer  
588 membrane. mCexE remains associated with the outer membrane by the single acyl chain incorporated  
589 onto the N-terminal glycine.

590

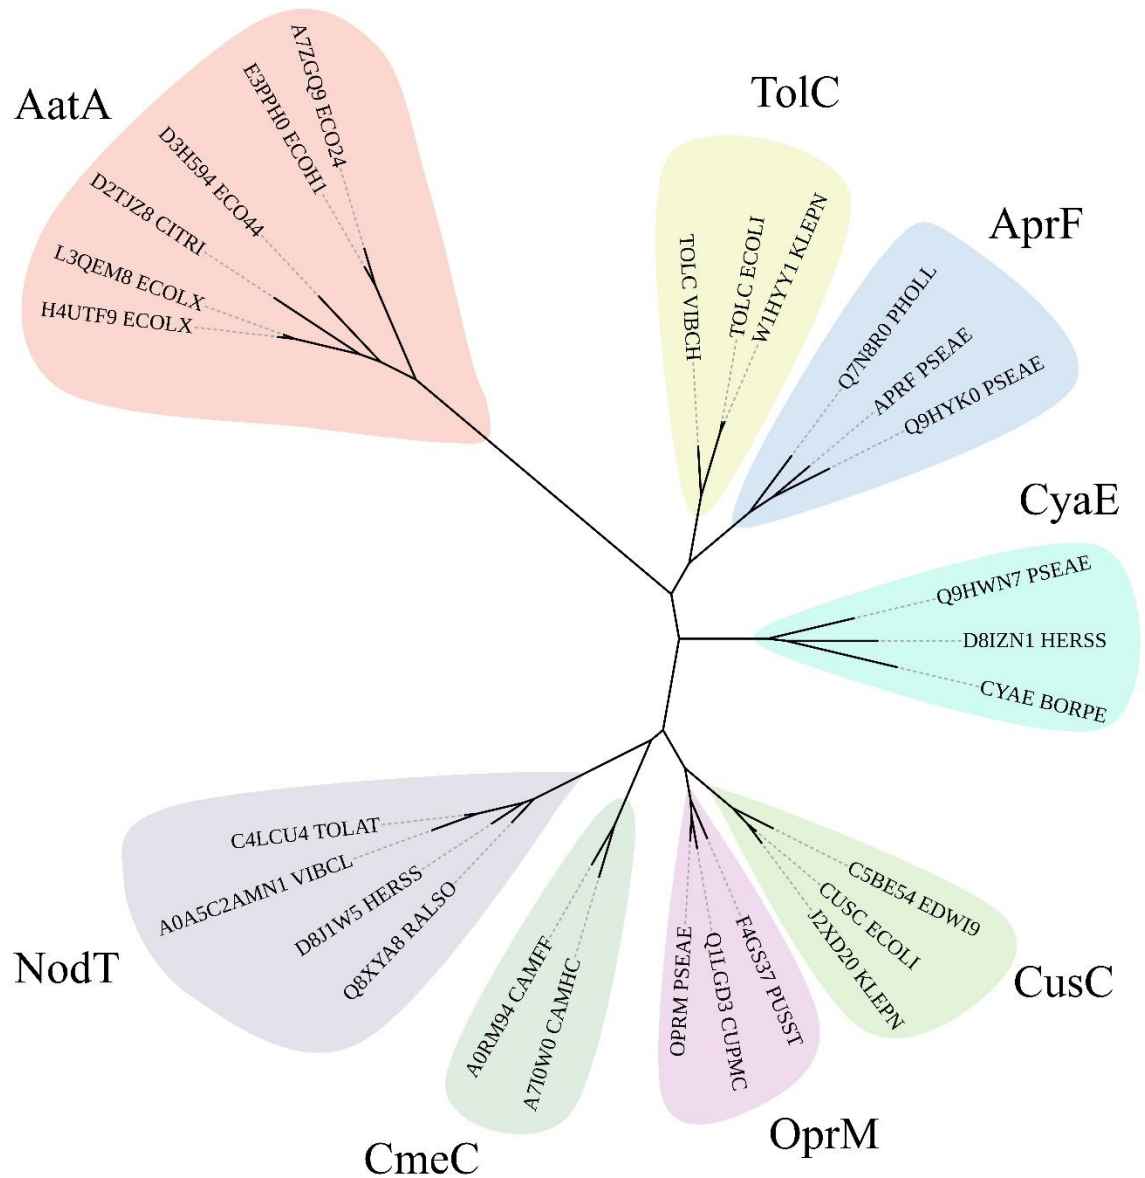

591

592 **Supplementary Fig S1. Phylogram of AatA, TolC and other OMP associated with T1SS and efflux**  
 593 **pumps.** The HMM of AatA proteins was used to confirm AatA as a homolog of TolC and OMP  
 594 proteins. Representative sequences of secretion associated OMPs (AprF, CyaE and TolC) and efflux  
 595 associated OMPs (CusC, OprM, CmeC, and NodT) were used to construct a phylogram. Although AatA  
 596 is more closely related to the secretion associated OMPs AprF and CyaE than the efflux associated  
 597 OMPs. TolC is a promiscuous protein that functions as the OMP for secretion and efflux systems. All  
 598 Phylograms were constructed using RAxML and drawn using iTOL.

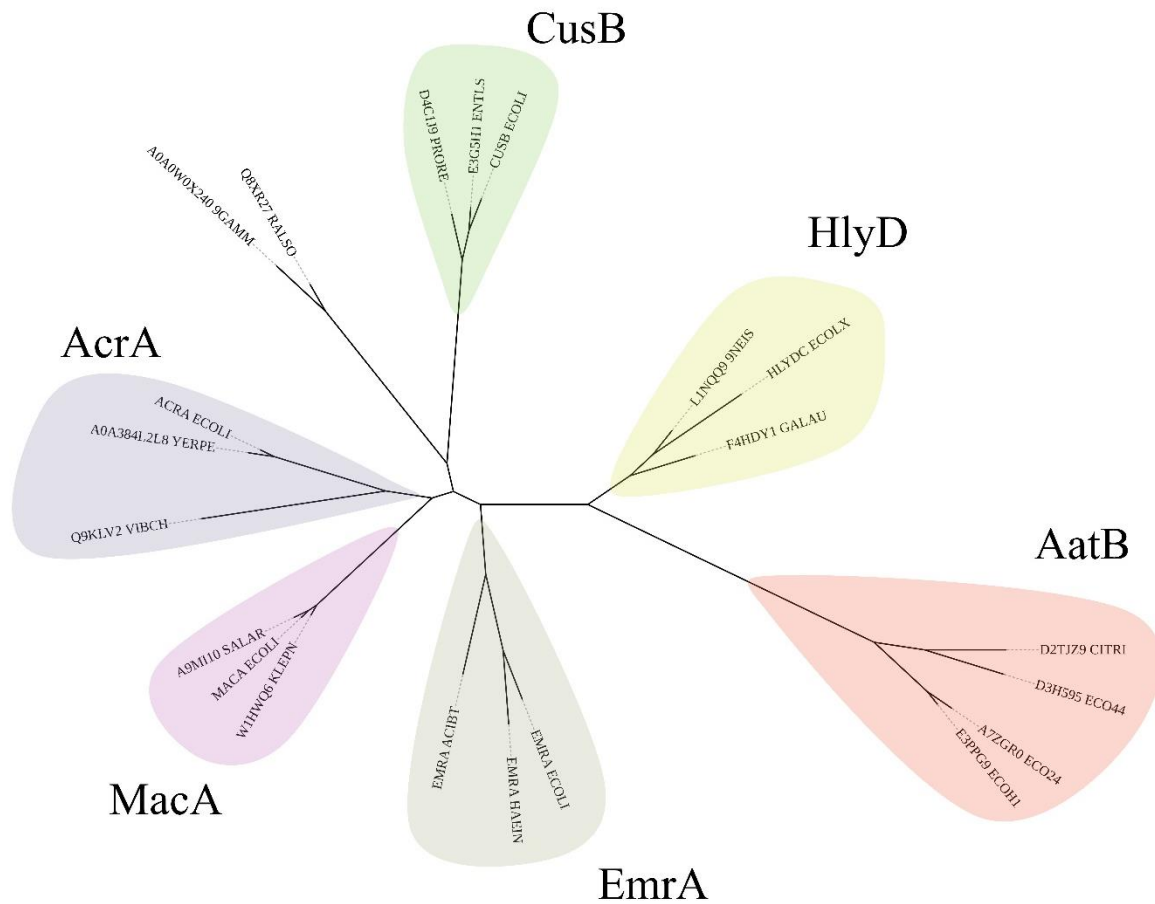

599

600 **Supplementary Fig S2. Phylogram of AatB and PAPs involved in T1SS and efflux pumps. The**

601 AatB HMM identified it as a homolog of the periplasmic adaptor proteins. Representative sequences of

602 PAPs involved in T1SS and efflux were used to construct a phylogenetic tree using RAxML. The

603 resulting tree was drawn in iTOL. AatB clades with the T1SS PAP HlyD which is involved in

604 haemolysin secretion instead of the efflux associated PAPs of EmrA, MacA, AcrA, and CusB.

605



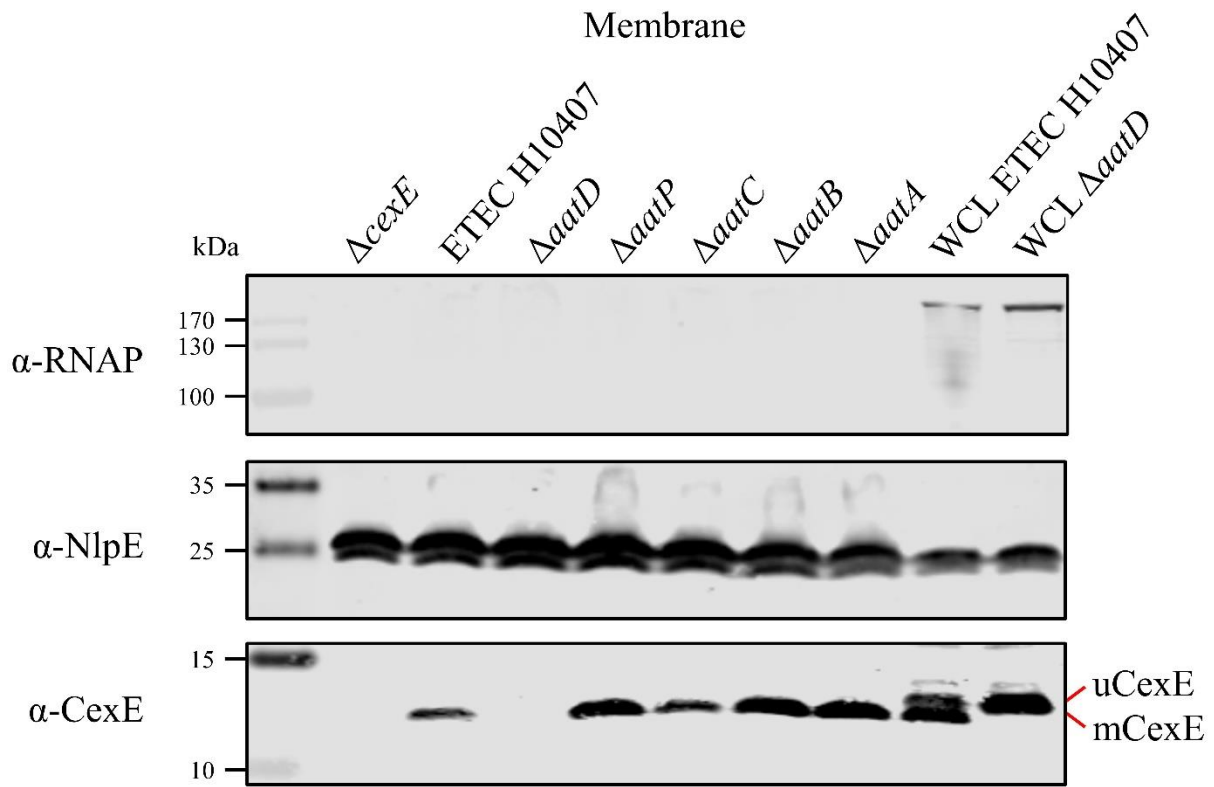

607 **Supplementary Fig S3. Membrane localisation of CexE.** The membrane fraction of ETEC H10407  
608 and *aat* mutant harbouring pCfaD were separated by SDS-PAGE. Transferred to nitrocellulose and  
609 probed for the cytoplasmic protein RNAP, lipoprotein NlpE and CexE using protein specific antibodies.

610

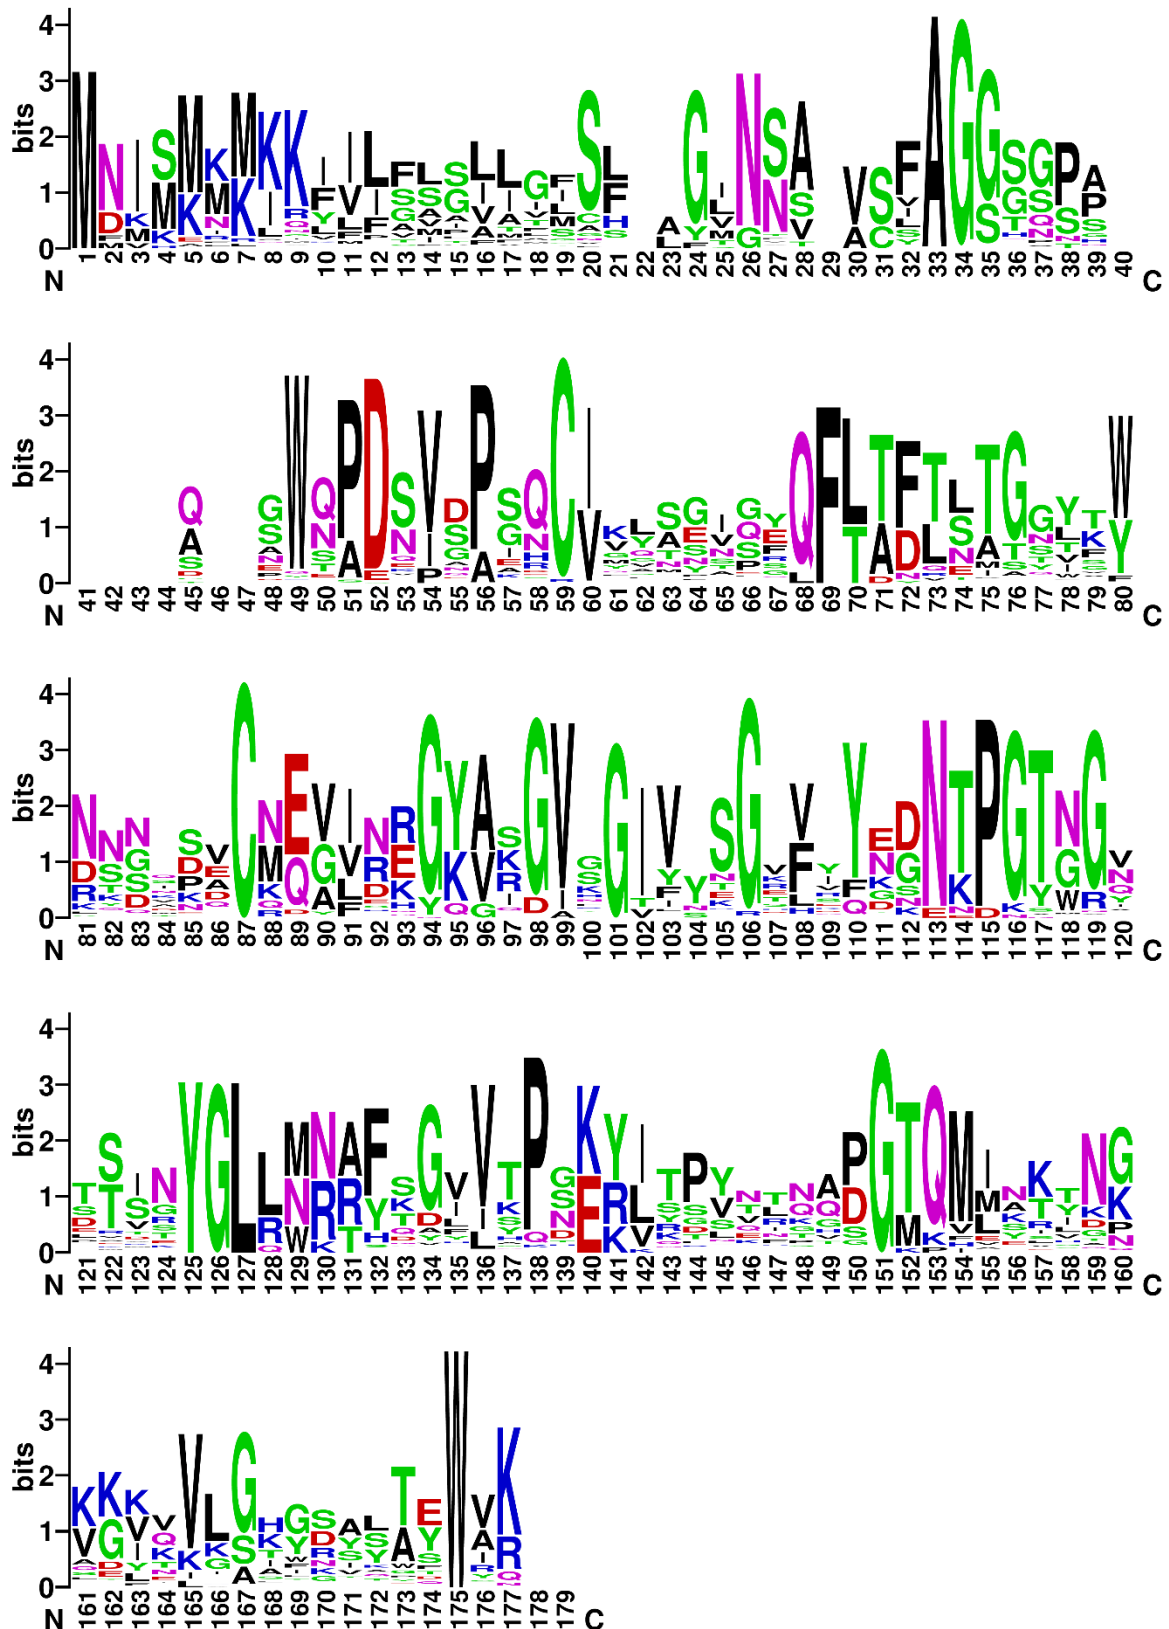

611

weblogo.berkeley.edu

612 **Supplementary Fig S4. WebLogo of Aap and CexE sequences.** Aap and CexE sequences were  
 613 aligned using ClustalO. The alignment was then placed into WebLogo.

614 **Supplementary Table S3. Bacterial strains used in this study**

| Strain                           | Description                                                                                          | Source                 |
|----------------------------------|------------------------------------------------------------------------------------------------------|------------------------|
| ETEC H10407                      | Prototypical enterotoxigenic strain.<br>CFA/1 <sup>+</sup> , LT <sup>+</sup> , ST <sup>+</sup>       | Evans and Evans (1973) |
| ETEC H10407 $\Delta$ <i>aapP</i> | <i>aapP</i> deletion mutant                                                                          | This study             |
| ETEC H10407 $\Delta$ <i>aapA</i> | <i>aapA</i> deletion mutant                                                                          | This study             |
| ETEC H10407 $\Delta$ <i>aapB</i> | <i>aapB</i> deletion mutant                                                                          | This study             |
| ETEC H10407 $\Delta$ <i>aapC</i> | <i>aapC</i> deletion mutant                                                                          | This study             |
| ETEC H10407 $\Delta$ <i>aapD</i> | <i>aapD</i> deletion mutant                                                                          | This study             |
| ETEC H10407 $\Delta$ <i>cexE</i> | <i>cexE</i> deletion mutant                                                                          | This study             |
| <i>E. coli</i> DH5 $\alpha$      | Cloning strain                                                                                       | NEB                    |
| <i>E. coli</i> BL21(DE3)         | Protein production strain                                                                            | Invitrogen             |
| EAEC 042                         | Prototypical enteroaggregative strain.<br>AAF/1 <sup>+</sup> , EAST1 <sup>+</sup> , Pet <sup>+</sup> | Nataro et al. (1985)   |
| EAEC 042 $\Delta$ <i>aap</i>     | EAEC 042 with pJB5603 inserted into<br><i>aap</i>                                                    | Sheikh et al. (2002)   |
| EAEC 042 $\Delta$ <i>aapD</i>    | EAEC 042 with pJB5603 inserted into<br><i>aapD</i>                                                   | Nishi et al. (2003)    |

615

616 **Supplementary Table S4: Primers used in this study.**

| Name                  | Sequence                                                                         | Description                                                                                        |
|-----------------------|----------------------------------------------------------------------------------|----------------------------------------------------------------------------------------------------|
| <i>CcexE</i> -F       | GGCGGCCATATGAAAAAATATATATTAG<br>GTGT                                             | Cloning <i>cexE</i> from ETEC H10407 into pET26(b)                                                 |
| <i>CcexE</i> -R       | CGAAGCCTCGAGTTTATACCAATAAGGG<br>GTGT                                             | Cloning <i>cexE</i> from ETEC H10407 into pET26(b)                                                 |
| GDaatP-F              | GAATTCAAGCTTGCAAAGCGTATTGTTG<br>GTGCAGGCTTGATAAAGTTATATGGACC<br>GGTCAATTGGCTGGAG | Forward primer for generating kanamycin cassette and disruption of <i>aatP</i> gene in ETEC H10407 |
| GDaatP-R              | GAGCTCCATATGAATATAAATAAATCT<br>TCATGAAAATCTTCTTTTATATAAATA<br>TCCTCCTTAGTTCC     | Reverse primer for generating kanamycin cassette and disruption of <i>aatP</i> gene in ETEC H10407 |
| GDaatA-F              | GAATTCAAGCTTGATTTATCAATCTTAA<br>TAAAAGAAAGATTTTCATGAAGAGACCG<br>GTCAATTGGCTGGAG  | Forward primer for generating kanamycin cassette and disruption of <i>aatA</i> gene in ETEC H10407 |
| GDaatA-R              | GAGCTCCATATGTATATAATTCAATTTT<br>ATTTTCTTTTATTAATCACTCTCAATAT<br>CCTCCTTAGTTCC    | Reverse primer for generating kanamycin cassette and disruption of <i>aatA</i> gene in ETEC H10407 |
| GDaatB-F              | GAATTCAAGCTTGAATTATATAAAATGC<br>ATATGTTTTTATTGGTTAGTTGACCG<br>GTCAATTGGCTGGAG    | Forward primer for generating kanamycin cassette and disruption of <i>aatB</i> gene in ETEC H10407 |
| GDaatB-R              | GAGCTCCATATGATCAACTTAATTTA<br>ATCATGTAGTGTATCTCAAATGCTGAA<br>TATCCTCCTTAGTTCC    | Reverse primer for generating kanamycin cassette and disruption of <i>aatB</i> gene in ETEC H10407 |
| GDaatC-F              | GAATTCAAGCTTCTTGGATACAGCATTT<br>GAGATAACACTACATGATTAATAGAC<br>CGGTCAATTGGCTGGAG  | Forward primer for generating kanamycin cassette and disruption of <i>aatC</i> gene in ETEC H10407 |
| GDaatC-R              | GAGCTCCATATGAAATCACATAAAATTT<br>TTATTAAGGATATAACCTCATAATA<br>TCCTCCTTAGTTCC      | Reverse primer for generating kanamycin cassette and disruption of <i>aatC</i> gene in ETEC H10407 |
| GDaatD-F              | GAATTCAAGCTTTCGTATATGGCATT<br>AATTATCTTTGAATTGATTAATGGACC<br>GGTCAATTGGCTGGAG    | Forward primer for generating kanamycin cassette and disruption of <i>aatD</i> gene in ETEC H10407 |
| GDaatD-R              | GAGCTCCATATGACCAAATGATGTATAT<br>GGTTTATACATCAATGACAAAAAATA<br>TCCTCCTTAGTTCC     | Reverse primer for generating kanamycin cassette and disruption of <i>aatD</i> gene in ETEC H10407 |
| <i>cexE</i> -F1       | GGGTTAAGTGATAACAGGCG                                                             | Forward flanking primer of <i>cexE</i> gene in ETEC H10407                                         |
| <i>cexE</i> -R1       | GCACCAACAATACGCTTTGC                                                             | Reverse flanking primer of <i>cexE</i> gene in ETEC H10407                                         |
| <i>aatP</i> -F1       | TACAATGTCGGGACTCAACC                                                             | Forward flanking primer of <i>aatP</i> gene in ETEC H10407                                         |
| <i>aatP</i> -R1       | ACATACGCAAATGCGGATGG                                                             | Reverse flanking primer of <i>aatP</i> gene in ETEC H10407                                         |
| <i>aatA</i> -F1       | CATCAGGTTGAGTTACTCGC                                                             | Forward flanking primer of <i>aatA</i> gene in ETEC H10407                                         |
| <i>aatA</i> -R1       | CATTGTAAGCATTGCTGGCG                                                             | Reverse flanking primer of <i>aatA</i> gene in ETEC H10407                                         |
| <i>aatB</i> -F1       | CATTCCGCTAAGTGGATTGC                                                             | Forward flanking primer of <i>aatB</i> gene in ETEC H10407                                         |
| <i>aatB</i> -R1       | ATATCCGACACATCACTCCC                                                             | Reverse flanking primer of <i>aatB</i> gene in ETEC H10407                                         |
| <i>aatC</i> -F1       | GTAATCCACATGTGCAAGGG                                                             | Forward flanking primer of <i>aatC</i> gene in ETEC H10407                                         |
| <i>aatC</i> -R1       | TGCCGTAGTTATTTCGTGAGG                                                            | Reverse flanking primer of <i>aatC</i> gene in ETEC H10407                                         |
| <i>aatD</i> -F1       | CTCCCTCTATAGTGTGTAGC                                                             | Forward flanking primer of <i>aatD</i> gene in ETEC H10407                                         |
| <i>aatD</i> -R1       | TCTGGCGTCCATTCATTTCC                                                             | Reverse flanking primer of <i>aatD</i> gene in ETEC H10407                                         |
| RM_ <i>cexE</i> _3-RV | ACCACCACCCGCAATCG                                                                | Remove all of <i>cexE</i> apart from the last 3 N-terminal glycine residues                        |
| RM_ <i>cexE</i> _2-RV | ACCACCCGCAATCGCGC                                                                | Remove all of <i>cexE</i> apart from the last 2 N-terminal glycine residues                        |
| RM_ <i>cexE</i> _1-RV | ACCCGCAATCGCGCTCAGG                                                              | Remove all of <i>cexE</i> apart from the last 1 N-terminal glycine residues                        |

|                     |                                                                               |                                                                     |
|---------------------|-------------------------------------------------------------------------------|---------------------------------------------------------------------|
| RM_ <i>cexE</i> -RV | CGCAATCGCGCTCAGGCTACC                                                         | Remove all of <i>cexE</i> apart from the signal sequence.           |
| RM_ <i>cexE</i> -FW | GTTAGCAAGGGCGAGGAAGATAAC                                                      | Forward primer for removing <i>cexE</i> from CexE-mCherry fusion.   |
| G20A-F              | TCCGCGATAGCTGCAGGCGGTAATTC                                                    | Substitution mutant G20A of <i>cexE</i>                             |
| G20A-R              | GAATTACCGCCTGCAGCTATCGCGGA                                                    | Substitution mutant G20A of <i>cexE</i>                             |
| G20E-F              | TCCGCGATAGCTGAAGGCGGTAATTC                                                    | Substitution mutant G20E of <i>cexE</i>                             |
| G20E-R              | GAATTACCGCCTTCAGCTATCGCGGA                                                    | Substitution mutant G20E of <i>cexE</i>                             |
| G21A-F              | GCGATAGCTGGAGCCGGTAATTCTGAAC<br>G                                             | Substitution mutant G21A of <i>cexE</i>                             |
| G21A-R              | CGTTCAGAATTACCGGCTCCAGCTATCG<br>C                                             | Substitution mutant G21A of <i>cexE</i>                             |
| G21E-F              | GCGATAGCTGGAGAAGGTAATTCTGAAC<br>G                                             | Substitution mutant G21E of <i>cexE</i>                             |
| G21E_R              | CGTTCAGAATTACCTTCTCCAGCTATCG<br>C                                             | Substitution mutant G21E of <i>cexE</i>                             |
| G22A-F              | GATAGCTGGAGGCGCTAATTCTGAACG                                                   | Substitution mutant G22A of <i>cexE</i>                             |
| G22A-R              | CGTTCAGAATTAGCGCCTCCAGCTATC                                                   | Substitution mutant G22A of <i>cexE</i>                             |
| G22E-F              | GATAGCTGGAGGCGAGAATTCTGAACG                                                   | Substitution mutant G22E of <i>cexE</i>                             |
| G22E-R              | CGTTCAGAATTCTCGCCTCCAGCTATC                                                   | Substitution mutant G22E of <i>cexE</i>                             |
| N23A-RH-F           | GCGTCTGAACGACCGCCTTCCG                                                        | Substitution mutant N23A of <i>cexE</i>                             |
| N23E-RH-F           | GAATCTGAACGACCGCCTTCCG                                                        | Substitution mutant N23E of <i>cexE</i>                             |
| N23-RH-R            | ACCGCCTCCAGCTATCGCG                                                           | Reverse primer for both N23A and N23E substitution mutants          |
| S24A-F              | GGAGGCGGTAATGCTGAACGACCGCC                                                    | Substitution mutant S24A of <i>cexE</i>                             |
| S24A-R              | GGAGGCGGTAATGCTGAACGACCGCC                                                    | Substitution mutant S24A of <i>cexE</i>                             |
| S24E-F              | GGAGGCGGTAATGAAGAACGACCGCC                                                    | Substitution mutant S24E of <i>cexE</i>                             |
| S24E-R              | GGCGGTCGTTCTTCATTACCGCCTCC                                                    | Substitution mutant S24E of <i>cexE</i>                             |
| H10407_E217A-FW     | CGACATCGATATGGTGGTTTTTAGCGCG<br>AACACCGTGTACGGTTTTCAAGAACCAG                  | Substitution mutant E217A of <i>aatD</i>                            |
| H10407_E217A-RV     | CTGGTCTTGAAACCGTACACGGTGTTT<br>GCGCTAAAAACCACCATATCGATGTCG                    | Substitution mutant E217A of <i>aatD</i>                            |
| H10407_K278A-FW     | CTATTACAAAGACAACCTTCGTATCAAC<br>CAAGCGAAAGCGCTGATTCCGTTTGTTG<br>AGCAGC        | Substitution mutant K278A of <i>aatD</i>                            |
| H10407_K278A-RV     | GCTGCTCAACAAACGGAATCAGCGCTTT<br>CGCTTGGTTGATCAGGAAGTTGTCTTTG<br>TAATAG        | Substitution mutant K278A of <i>aatD</i>                            |
| H10407_E286A-FW     | GCGCTGATTCGGTTTGGTGGCAGCAAT<br>GGTTCTTTAGC                                    | Substitution mutant E286A of <i>aatD</i>                            |
| H10407_E286A-RV     | GCTAAAGAACCATTGCTGCGCAACAAAC<br>GGAATCAGCGC                                   | Substitution mutant E286A of <i>aatD</i>                            |
| H10407_C325A-FW     | CAACCACAACGGTATCAACATTAAGACC<br>TATATTGCGTACGATGTTCTGTCCCGG<br>AAACCCATAAAAGC | Substitution mutant C325A of <i>aatD</i>                            |
| H10407_C325A-RV     | GCTTTTATGGGTTTCCGGGAACAGAAC<br>TCGTACGCAATATAGGTCTTAATGTTGA<br>TACCGTTGTGGTTG | Substitution mutant C325A of <i>aatD</i>                            |
| T7F                 | TAATACGACTCACTATAGGG                                                          | Forward primer for amplification of pET26b(+) multiple cloning site |
| T7R                 | GCTAGTTATTGCTCAGCGG                                                           | Reverse primer for amplification of pET26b(+) multiple cloning site |

618 **Supplementary Table S5. Plasmids used in this study**

| Plasmid                  | Description                                                                                                | Source                     |
|--------------------------|------------------------------------------------------------------------------------------------------------|----------------------------|
| pDOC-K                   | contains <i>bla</i> and <i>kanR</i> with FRT sites                                                         | Lee et al. (2009)          |
| pKD46                    | Heat sensitive plasmid with $\lambda$ Red recombinase genes expressed in response to L-arabinose           | Datsenko and Wanner (2000) |
| pCP20                    | Heat sensitive plasmid encoding Flp recombinase gene                                                       | Datsenko and Wanner (2000) |
| pET26b(+)                | T7 expression vector with C-terminal 6His tag, IPTG inducible, <i>kanR</i>                                 | Novagen                    |
| pET26b- <i>cexE</i>      | pET26b with <i>cexE</i> from ETEC H10407                                                                   | This study                 |
| pBAD/myc-HisA            | L-arabinose expression vector with C-terminal Myc and 6His tag                                             | Invitrogen                 |
| pJNW                     | Complete <i>aat</i> gene cluster from EAEC 042 cloned into pZC320                                          | Nishi et al. (2003)        |
| pCfaD                    | pBAD/myc-HisA with <i>cfaD</i> under PBAD from ETEC H10407                                                 | This study                 |
| pACYC184                 | Plasmid with p15A origin of replication                                                                    | Chang and Cohen (1978)     |
| pACYC- <i>cexE</i> -6His | pACYC184 with <i>cexE</i> under the control of the native <i>cexE</i> promoter with a C-terminal 6 His tag | This study                 |
| pACYCDuet-1              | Plasmid with p15A origin of replication and two T7 promoters.                                              | Novagen                    |
| pACYC- <i>aatD</i>       | The ETEC H10407 <i>aatD</i> gene was synthesised by Genscript and transformed in pACYCDuet-1               | This study                 |
| pRSF-GGG-mCherry         | mCherry with three glycine residues at the N-terminus after the CexE signal sequence                       | This study                 |
| pRSF-GG-mCherry          | mCherry with two glycine residues at the N-terminus after the CexE signal sequence                         | This study                 |
| pRSF-G-mCherry           | mCherry with one glycine residue at the N-terminus after the CexE signal sequence                          | This study                 |
| pRSF-SS-mCherry          | mCherry with the CexE signal sequence                                                                      | This study                 |

619

## 620 References

- 621  
622 Altschul, S. F., Madden, T. L., Schäffer, A. A., Zhang, J., Zhang, Z., Miller, W., & Lipman, D. J.  
623 (1997). Gapped BLAST and PSI-BLAST: a new generation of protein database search  
624 programs. *Nucleic Acids Res*, 25(17), 3389–3402.
- 625 Babu, M. M., Priya, M. L., Selvan, A. T., Madera, M., Gough, J., Aravind, L., & Sankaran, K. (2006).  
626 A database of bacterial lipoproteins (DOLOP) with functional assignments to predicted  
627 lipoproteins. *J Bacteriol*, 188(8), 2761–2773. <https://doi.org/10.1128/JB.188.8.2761-2773.2006>
- 628 Baldi, D. L., Higginson, E. E., Hocking, D. M., Praszker, J., Cavaliere, R., James, C. E., Bennett-  
629 Wood, V., Azzopardi, K. I., Turnbull, L., Lithgow, T., Robins-Browne, R. M., Whitchurch, C.  
630 B., & Tauschek, M. (2012). The type II secretion system and its ubiquitous lipoprotein substrate,  
631 SslE, are required for biofilm formation and virulence of enteropathogenic *Escherichia coli*.  
632 *Infect Immun*, 80(6), 2042–2052. <https://doi.org/10.1128/IAI.06160-11>
- 633 Baudry, B., Savarino, S. J., Vial, P., Kaper, J. B., & Levine, M. M. (1990). A Sensitive and Specific  
634 DNA Probe to Identify Enterococcal *Escherichia coli*, a Recently Discovered Diarrheal  
635 Pathogen. *J Infect Dis*, 161(6), 1249–1251.
- 636 Belmont-Monroy, L., Saitz-rojas, W., Soria-bustos, J., Mickey, S., Sherman, N. E., Orsburn, B. C.,  
637 Ruiz-perez, F., & Santiago, A. E. (2020). Characterization of a novel AraC/XylS- regulated  
638 family of N-acyltransferases in pathogens of the order Enterobacterales. *PLoS Pathog*, 16(8),  
639 e1008776. <https://doi.org/10.1371/journal.ppat.1008776>
- 640 Chang, A. C. Y., & Cohen, S. N. (1978). Construction and characterization of amplifiable multicopy  
641 DNA cloning vehicles derived from the P15A cryptic miniplasmid. *J Bacteriol*, 134(3), 1141–  
642 1156. <https://doi.org/10.1128/jb.134.3.1141-1156.1978>
- 643 Cowles, C. E., Li, Y., Semmelhack, M. F., Cristea, I. M., & Silhavy, T. J. (2012). The free and bound  
644 forms of Lpp occupy distinct subcellular locations in *Escherichia coli*. *Mol Microbiol*, 79(5),  
645 1168–1181. <https://doi.org/10.1111/j.1365-2958.2011.07539.x>.The
- 646 Crossman, L. C., Chaudhuri, R. R., Beatson, S. A., Wells, T. J., Desvaux, M., Cunningham, A. F.,  
647 Petty, N. K., Mahon, V., Brinkley, C., Hobman, J. L., Savarino, S. J., Turner, S. M., Pallen, M.  
648 J., Penn, C. W., Parkhill, J., Turner, A. K., Johnson, T. J., Thomson, N. R., Smith, S. G. J., &  
649 Henderson, I. R. (2010). A commensal gone bad: complete genome sequence of the prototypical  
650 enterotoxigenic *Escherichia coli* strain H10407. *J Bacteriol*, 192(21), 5822–5831.  
651 <https://doi.org/10.1128/JB.00710-10>
- 652 Crow, A., Greene, N. P., Kaplan, E., & Koronakis, V. (2017). Structure and mechanotransmission  
653 mechanism of the MacB ABC transporter superfamily. *Proc Natl Acad Sci USA*, 114(47),  
654 12572–12577. <https://doi.org/10.1073/pnas.1712153114>
- 655 Datsenko, K. a, & Wanner, B. L. (2000). One-step inactivation of chromosomal genes in *Escherichia*  
656 *coli* K-12 using PCR products. *Proc Natl Acad Sci USA*, 97(12), 6640–6645.  
657 <https://doi.org/10.1073/pnas.120163297>
- 658 Dev, I. K., Harvey, R. J., & Ray, P. H. (1985). Inhibition of prolipoprotein signal peptidase by  
659 globomycin. *J Biol Chem*, 260(10), 5891–5894.
- 660 Duronio, R. J., Jackson-Machelski, E., Heuckeroth, R. O., Olins, P. O., Devine, C. S., Yonemoto, W.,  
661 Slice, L. W., Taylor, S. S., & Gordon, J. I. (1990). Protein N-myristoylation in *Escherichia coli*:  
662 Reconstitution of a eukaryotic protein modification in bacteria. *Proc Natl Acad Sci USA*, 87(4),  
663 1506–1510. <https://doi.org/10.1073/pnas.87.4.1506>
- 664 Evans, D. J., & Evans, D. G. (1973). Three Characteristics Associated with Enterotoxigenic  
665 *Escherichia coli* Isolated from Man. *Infect Immun*, 8(3), 322–328.
- 666 Finn, R. D., Clements, J., & Eddy, S. R. (2011). HMMER web server: interactive sequence similarity  
667 searching. *Nucleic Acids Res*, 39(W29), W29–37. <https://doi.org/10.1093/nar/gkr367>
- 668 Fitzpatrick, A. W. P., Llabrés, S., Neuberger, A., Blaza, J. N., Bai, X., Okada, U., Murakami, S.,  
669 Veen, H. W. Van, Zachariae, U., Scheres, S. H. W., Luisi, B. F., & Du, D. (2017). Structure of  
670 the MacAB–TolC ABC-type tripartite multidrug efflux pump. *Nat Microbiol*, 2, 17070.  
671 <https://doi.org/10.1038/nmicrobiol.2017.70>
- 672 Gélis-Jeanvoine, S., Lory, S., Oberto, J., & Buddelmeijer, N. (2015). Residues located on membrane-

- 673 embedded flexible loops are essential for the second step of the apolipoprotein N-acyltransferase  
674 reaction. *Mol Microbiol*, 95(4), 692–705. <https://doi.org/10.1111/mmi.12897>
- 675 Grabowicz, M. (2019). Lipoproteins and Their Trafficking to the Outer Membrane. *EcoSal Plus*, 8(2),  
676 1–8. <https://doi.org/10.1128/ecosalplus.esp-0038-2018>
- 677 Gupta, S. D., Gan, K., Schmid, M. B., & Wu, H. C. (1993). Characterization of a temperature-  
678 sensitive mutant of Salmonella typhimurium defective in apolipoprotein N-acyltransferase. *J*  
679 *Biol Chem*, 268(22), 16551–16556.
- 680 Hancock, J. F., Magee, A. I., Childs, J. E., & Marshall, C. J. (1989). All ras proteins are  
681 polyisoprenylated but only some are palmitoylated. *Cell*, 57(7), 1167–1177.  
682 [https://doi.org/10.1016/0092-8674\(89\)90054-8](https://doi.org/10.1016/0092-8674(89)90054-8)
- 683 Hodson, C., Yang, J., Hocking, D. M., Azzopardi, K., Chen, Q., Holien, J. K., Parker, M. W.,  
684 Tauschek, M., & Robins-browne, R. M. (2017). Control of Virulence Gene Expression by the  
685 Master Regulator, CfaD, in the Prototypical Enterotoxigenic Escherichia coli Strain, H10407.  
686 *Front Microbiol*, 11(8), 1525. <https://doi.org/10.3389/fmicb.2017.01525>
- 687 Hooda, Y., Lai, C. C. L., Judd, A., Buckwalter, C. M., Shin, H. E., Gray-Owen, S. D., & Moraes, T.  
688 F. (2016). Slam is an outer membrane protein that is required for the surface display of lipidated  
689 virulence factors in Neisseria. *Nat Microbiol*, 1(4), 16009.  
690 <https://doi.org/10.1038/nmicrobiol.2016.9>
- 691 Huie, J. L., & Silhavy, T. J. (1995). Suppression of signal sequence defects and azide resistance in  
692 Escherichia coli commonly result from the same mutations in secA. *J Bacteriol*, 177(12), 3518–  
693 3526.
- 694 Kelley, L. A., Mezulis, S., Yates, C. M., Wass, M. N., & Sternberg, M. J. (2016). The Phyre2 web  
695 protal for protein modeling, prediction and analysis. *Nat Protoc*, 10(6), 845–858.  
696 <https://doi.org/10.1038/nprot.2015-053>
- 697 Konovalova, A., Perlman, D. H., Cowles, C. E., & Silhavy, T. J. (2014). Transmembrane domain of  
698 surface-exposed outer membrane lipoprotein RcsF is threaded through the lumen of  $\beta$ -barrel  
699 proteins. *Proc Natl Acad Sci USA*, 111(41), E4350–E4358.  
700 <https://doi.org/10.1073/pnas.1417138111>
- 701 Kurtzhals, P. (2007). Pharmacology of Insulin Detemir. *Endocrinol Metab Clin North Am*, 36(1), 14–  
702 20. [https://doi.org/10.1016/S0889-8529\(07\)80004-1](https://doi.org/10.1016/S0889-8529(07)80004-1)
- 703 Lee, D. J., Bingle, L. E. H., Heurlier, K., Pallen, M. J., Penn, C. W., Busby, S. J. W., & Hobman, J. L.  
704 (2009). Gene doctoring: a method for recombineering in laboratory and pathogenic Escherichia  
705 coli strains. *BMC Microbiol*, 9, 252. <https://doi.org/10.1186/1471-2180-9-252>
- 706 Letunic, I., & Bork, P. (2019). Interactive Tree of Life (iTOL) v4: Recent updates and new  
707 developments. *Nucleic Acids Res*, 47(W1), 256–259. <https://doi.org/10.1093/nar/gkz239>
- 708 Madeira, F., Park, Y. M., Lee, J., Buso, N., Gur, T., Madhusoodanan, N., Basutkar, P., Tivey, A. R.  
709 N., Potter, S. C., Finn, R. D., & Lopez, R. (2019). The EMBL-EBI search and sequence analysis  
710 tools APIs in 2019. *Nucleic Acids Res*, 47(W1), W636–W641.  
711 <https://doi.org/10.1093/nar/gkz268>
- 712 Martin, D. D. O., Beauchamp, E., & Berthiaume, L. G. (2011). Post-translational myristoylation: Fat  
713 matters in cellular life and death. *Biochimie*, 93(1), 18–31.  
714 <https://doi.org/10.1016/j.biochi.2010.10.018>
- 715 Masao Tokunaga, Hiroko Tokunaga, & Wu, H. C. (1984). Post-translational modification and  
716 processing of outer membrane prolipoproteins in Escherichia coli. *Mol Cell Biochem*, 60(1), 5–  
717 15. <https://doi.org/10.1007/BF00226297>
- 718 Moore, S. D., & Prevelige, P. E. (2002). A P22 Scaffold Protein Mutation Increases the Robustness of  
719 Head Assembly in the Presence of Excess Portal Protein. *J Virol*, 76(20), 10245–10255.  
720 <https://doi.org/10.1128/jvi.76.20.10245-10255.2002>
- 721 Nakayama, H., Kurokawa, K., & Lee, B. L. (2012). Lipoproteins in bacteria: structures and  
722 biosynthetic pathways. *FEBS J*, 279(23), 4247–4268. <https://doi.org/10.1111/febs.12041>
- 723 Nataro, J., Baldini, M., Kaper, J., Black, R., Bravo, N., & Levine, M. (1985). Detection of an  
724 adherence factor of enteropathogenic Escherichia coli with a DNA probe. *J Infect Dis*, 152(3),  
725 560–565.
- 726 Nishi, J., Sheikh, J., Mizuguchi, K., Luisi, B., Burland, V., Boutin, A., Rose, D. J., Blattner, F. R., &  
727 Nataro, J. P. (2003). The export of coat protein from enteroaggregative Escherichia coli by a



- 728 specific ATP-binding cassette transporter system. *J Biol Chem*, 278(46), 45680–45689.  
729 <https://doi.org/10.1074/jbc.M306413200>
- 730 Oliver, D. B., Cabelli, R. J., Dolan, K. M., & Jarosik, G. P. (1990). Azide-resistant mutants of  
731 *Escherichia coli* alter the SecA protein, an azide-sensitive component of the protein export  
732 machinery. *Proc Natl Acad Sci USA*, 87(21), 8227–8231.
- 733 Pepinsky, R. B., Zeng, C., Went, D., Rayhorn, P., Baker, D. P., Williams, K. P., Bixler, S. A.,  
734 Ambrose, C. M., Garber, E. A., Miatkowski, K., Taylor, F. R., Wang, E. A., & Galdes, A.  
735 (1998). Identification of a palmitic acid-modified form of human Sonic hedgehog. *J Biol Chem*,  
736 273(22), 14037–14045. <https://doi.org/10.1074/jbc.273.22.14037>
- 737 Petty, N. K., Bulgin, R., Crepin, V. F., Cerdeño-Tárraga, A. M., Schroeder, G. N., Quail, M. a,  
738 Lennard, N., Corton, C., Barron, A., Clark, L., Toribio, A. L., Parkhill, J., Dougan, G., Frankel,  
739 G., & Thomson, N. R. (2010). The *Citrobacter rodentium* genome sequence reveals convergent  
740 evolution with human pathogenic *Escherichia coli*. *J Bacteriol*, 192(2), 525–538.  
741 <https://doi.org/10.1128/JB.01144-09>
- 742 Pilonieta, M. C., Boderó, M. D., & Munson, G. P. (2007). CfaD-dependent expression of a novel  
743 extracytoplasmic protein from enterotoxigenic *Escherichia coli*. *J Bacteriol*, 189(14), 5060–  
744 5067. <https://doi.org/10.1128/JB.00131-07>
- 745 Resh, M. D. (1994). Myristylation and palmitoylation of Src family members: The fats of the matter.  
746 *Cell*, 76(3), 411–413. [https://doi.org/10.1016/0092-8674\(94\)90104-X](https://doi.org/10.1016/0092-8674(94)90104-X)
- 747 Rivas, Z. P., Talbot, K. M., Merselis, L. C., McCormack, R. M., Adkins, B., & Munson, G. P. (2020).  
748 CexE Is a Coat Protein and Virulence Factor of Diarrheagenic Pathogens. *Front Microbiol*,  
749 11(1374), 1–13. <https://doi.org/10.3389/fmicb.2020.01374>
- 750 Schägger, H. (2006). Tricine-SDS-PAGE. *Nat Protoc*, 1(1), 16–22.  
751 <https://doi.org/10.1038/nprot.2006.4>
- 752 Sheikh, J., Czczulin, J. R., Harrington, S., Hicks, S., Henderson, I. R., Le Bouguéneq, C., Gounon,  
753 P., Phillips, A., & Nataro, J. P. (2002). A novel dispersin protein in enteroaggregative  
754 *Escherichia coli*. *J Clin Invest*, 110(9), 1329–1337. <https://doi.org/10.1172/JCI16172>
- 755 Stamatakis, A. (2014). RAxML version 8 : a tool for phylogenetic analysis and post-analysis of large  
756 phylogenies. *Bioinformatics*, 30(9), 1312–1313. <https://doi.org/10.1093/bioinformatics/btu033>
- 757 The UniProt Consortium. (2019). UniProt: A worldwide hub of protein knowledge. *Nucleic Acids*  
758 *Res*, 47, D506–D515. <https://doi.org/10.1093/nar/gky1049>
- 759 Thompson, B. J., Widdick, D. A., Hicks, M. G., Chandra, G., Sutcliffe, I. C., Palmer, T., &  
760 Hutchings, M. I. (2010). Investigating lipoprotein biogenesis and function in the model Gram-  
761 positive bacterium *Streptomyces coelicolor*. *Mol Microbiol*, 77(4), 943–957.  
762 <https://doi.org/10.1111/j.1365-2958.2010.07261.x>
- 763 Veronese, F. D., Copeland, T. D., Oroszlan, S., Gallo, R. C., & Sarngadharan, M. G. (1988).  
764 Biochemical and immunological analysis of human immunodeficiency virus gag gene products  
765 p17 and p24. *J Virol*, 62(3), 795–801. <https://doi.org/10.1128/jvi.62.3.795-801.1988>
- 766 Vidal-Ingigliardi, D., Lewenza, S., & Buddelmeijer, N. (2007). Identification of Essential Residues in  
767 Apolipoprotein N-Acyl Transferase, a Member of the CN Hydrolase Family. *J Bacteriol*,  
768 189(12), 4456–4464. <https://doi.org/10.1128/JB.00099-07>
- 769 Widdick, D. A., Hicks, M. G., Thompson, B. J., Tschumi, A., Chandra, G., Sutcliffe, I. C., Brülle, J.  
770 K., Sander, P., Palmer, T., & Hutchings, M. I. (2011). Dissecting the complete lipoprotein  
771 biogenesis pathway in *Streptomyces scabies*. *Mol Microbiol*, 80(5), 1395–1412.  
772 <https://doi.org/10.1111/j.1365-2958.2011.07656.x>
- 773 Wiktor, M., Weichert, D., Howe, N., Huang, C. Y., Olieric, V., Boland, C., Bailey, J., Vogeley, L.,  
774 Stansfeld, P. J., Buddelmeijer, N., Wang, M., & Caffrey, M. (2017). Structural insights into the  
775 mechanism of the membrane integral N-acyltransferase step in bacterial lipoprotein synthesis.  
776 *Nat Commun*, 8, 15952. <https://doi.org/10.1038/ncomms15952>
- 777 Yamanaka, H., Kobayashi, H., Takahashi, E., & Okamoto, K. (2008). MacAB is involved in the  
778 secretion of *Escherichia coli* heat-stable enterotoxin II. *J Bacteriol*, 190(23), 7693–7698.  
779 <https://doi.org/10.1128/JB.00853-08>
- 780 Zückert, W. R. (2014). Secretion of bacterial lipoproteins: through the cytoplasmic membrane, the  
781 periplasm and beyond. *Biochim Biophys Acta*, 1843(8), 1509–1516.  
782 <https://doi.org/10.1016/j.bbamcr.2014.04.022>

783  
784
